# Supplementary material
Source: PubMed Central journal article supplement (PMC5551554)
Supplement: en.2017-00104.sd1.pdf [file en.2017-00104.sd1.pdf]

## Protective role of complement C3 against cytokine-mediated $\beta$ -cell apoptosis

Reinaldo S. Dos Santos<sup>1\*</sup>, Laura Marroqui<sup>1</sup>, Fabio A. Grieco<sup>1</sup>, Lorella Marselli<sup>2</sup>, Mara Suleiman<sup>2</sup>, Stefan R. Henz<sup>3</sup>, Piero Marchetti<sup>2</sup>, Rasmus Wernersson<sup>3,4</sup>, Decio L. Eizirik<sup>1,5\*</sup>

### Supplemental Data

#### Supplemental Experimental Procedures

#### Protein-protein Interaction Analysis

From the total pool of high-confidence interactions we defined the following collections of sub-networks for further investigation:

- 1) **“1<sup>st</sup> order networks”**: For each protein represented in the filtered interaction dataset a network containing itself and its direct interaction partners were extracted. This yielded 17.000 networks (data not shown).
- 2) **“C3 network”**: A single network containing C3 and its 1<sup>st</sup> order interaction partners (technically also part of set #1). This network contained 217 proteins in total, including C3.
- 3) **“C3 neighbor networks”**: For each of the 216 proteins interacting with C3 the 1<sup>st</sup> order network around the protein was extracted (technically also part of set #1).

For the statistical analysis of the network, the previously published RNAseq datasets from Eizirik and collaborators (1) and five new, unpublished datasets from Eizirik’s group (similar experimental design as in 1) were prepared as follows:

- 1) Gene level  $p$ -value was mapped to UniProtKB AC – in rare cases of one-to-many and many-to-one mappings the lowest  $p$ -value was kept.
- 2) The 10 individual pairwise comparisons in the RNAseq data were combined at the  $p$ -value level by Edington’s method. This method was chosen as being the most conservative, and requires genes to be consistently regulated across the majority of the studies in order to receive a strong integrated  $p$ -value.

For **each** network in a network collection, the following algorithm was applied:

- 1) The protein-level  $p$ -values from the RNAseq dataset were mapped onto the nodes of the network. Missing values were handled by reducing the effective size of the network.
- 2) An original score for the network was calculated using Fisher’s methods for combining the individual  $p$ -values.
- 3) The significance of the original score was assessed by Monte Carlo simulation: the nodes in the network were resampled from the entire pool of data, and a new integrated score was calculated – the procedure was repeated up to 1,000,000 times. Lastly, the original integrated score was compared to the estimated background from the simulation, and converted to an empirically estimated  $p$ -value (fraction of simulations getting an equal or better score than the original vs. the total number of permutations).

The network depicted in figure 1 is also available as a Cytoscape ([cytoscape.org](http://cytoscape.org)) session file (“C3\_1st\_order.cys”; upon request) – the visualization used in Figure 1 is embedded as a style named “C3\_network”.

## **Histology**

We performed histology using pancreas sections from two cohorts in two different laboratories, and we thus describe below the methodology used in each laboratory.

In Brussels, pancreas sections from previously characterized (2) samples from the nPOD collection were subjected to antigen retrieval by boiling the sections in 10 mM citrate buffer (pH 6.0) for 10 min. After overnight incubation at 4°C with primary antibody against C3, slides were double-stained with an anti-insulin antibody (Guinea pig polyclonal antibody DAKO, Glostrup, Denmark; dilution 1:250) for 1 h at room temperature. Alexa Fluor fluorescent secondary antibodies (Molecular Probes-Invitrogen) were applied for 1 h at room temperature (Alexa Fluor 568 Goat anti-rabbit and Alexa Fluor 488 Goat anti-guinea pig; dilution 1:500). After nuclear staining with Hoechst, pancreas sections were mounted with Fluorescence Mounting Medium (DAKO). Immunofluorescence was visualized on a Zeiss microscope (Axio ImagerA1, Zeiss-Vision, Munich, Germany) equipped with a camera (Axio CAM Zeiss), as previously described (2). Images were acquired using Zeiss/EC Plan Neofluar objective lenses at 40x magnification and Axio Vision Zeiss software.

In Pisa, pancreas sections obtained at the University of Pisa collection were subjected to antigen retrieval by 3 passages (5 minutes each) in 10 mM citrate buffer (pH 6.0) in microwave at 750 Watt; citrate buffer was replaced at each step. After overnight incubation at 4°C with primary antibody against C3, slides were double-stained with an anti-insulin antibody (Guinea pig polyclonal anti-insulin, Abcam; dilution 1:100) for 1 h at room temperature. Secondary antibodies DyLight™ 594 Donkey anti-guinea pig secondary antibody (DyLight™ 594, Jackson ImmunoResearch; dilution 1:200) and Alexa Fluor 488 Donkey anti-rabbit (Jackson ImmunoResearch Baltimore, PA, USA; dilution 1:200) were applied for 1 h at room temperature. Pancreas sections were mounted with Mounting Medium containing DAPI (VECTASHIELD, Vector Laboratories, Inc. Burlingame, CA, USA). Sections were analyzed using a Leica DM5500 B microscope (Leica, Wetzlar, Germany) equipped with the DFC310 FX camera (Leica). Images were acquired using Leica HCX PL FLUOTAR objective lenses at 10x, 20x, and 40x magnification and Leica MetaMorph® software, v1.8.0.

## Supplemental Figures and Tables

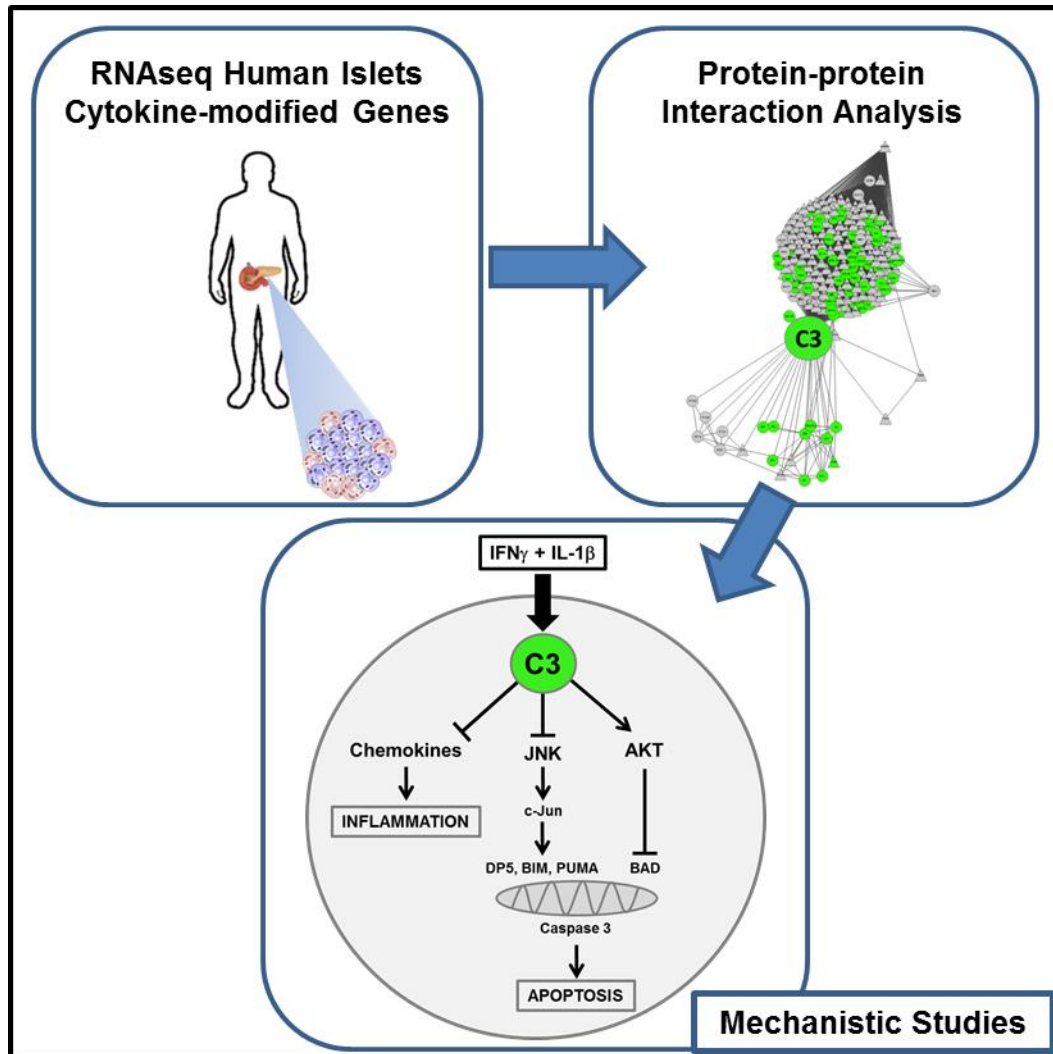

**Supplemental Figure 1. Overview of the steps used in the present study.** RNA sequencing data of human islets exposed to the proinflammatory cytokines IL-1 $\beta$  + IFN $\gamma$  were used to perform a protein-protein interaction analysis. Based on the results of the analysis, we performed mechanistic studies to assess C3 role in  $\beta$ -cell survival.

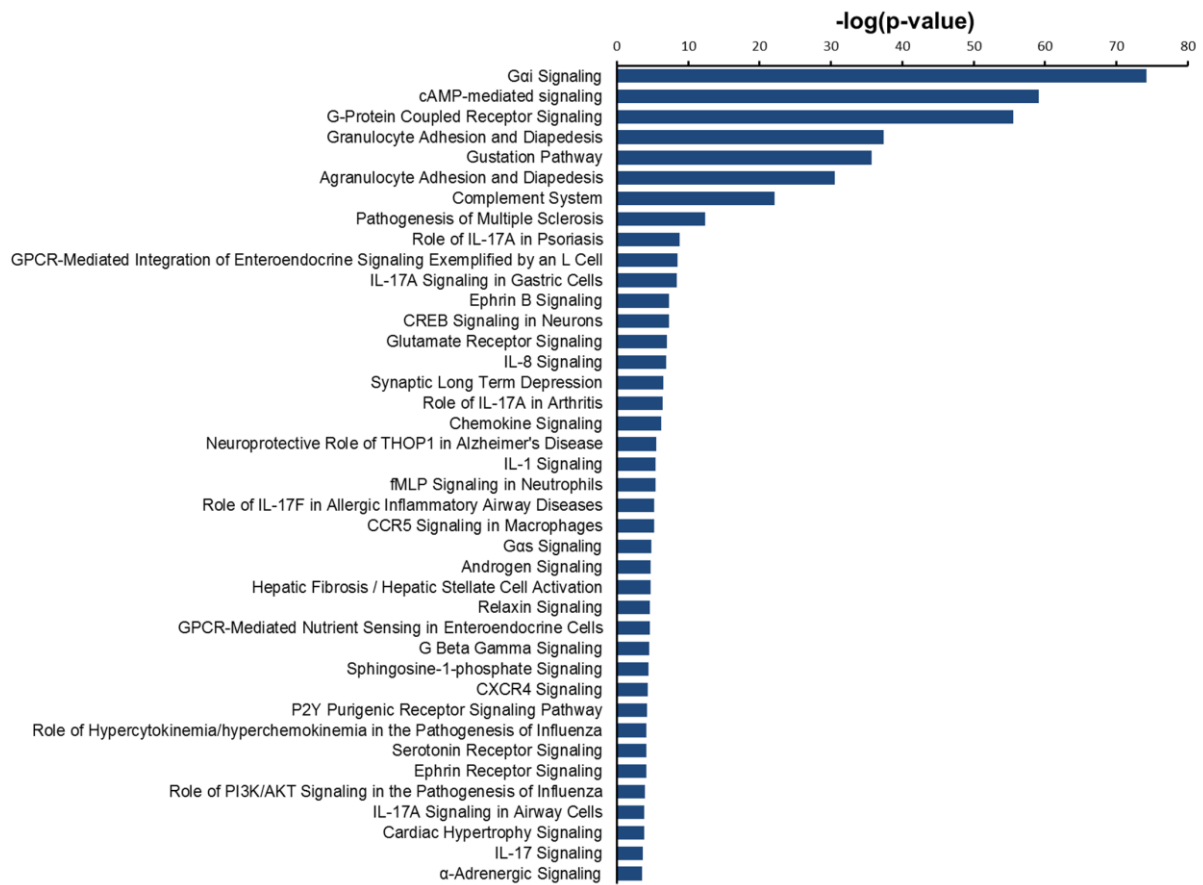

**Supplemental Figure 2. Ingenuity Pathway Analysis (IPA) of candidate genes for C3 interacting partners in human islets.**

IPA of C3 and its 216 protein partners identified by our protein-protein analysis is shown for the top 40 “Canonical Pathways”. The length of the bars designates the significance of the association between the set of proteins and the keyword, and is expressed as minus the logarithm of the probability that a random set of genes from the human genome would be associated with the same keyword.

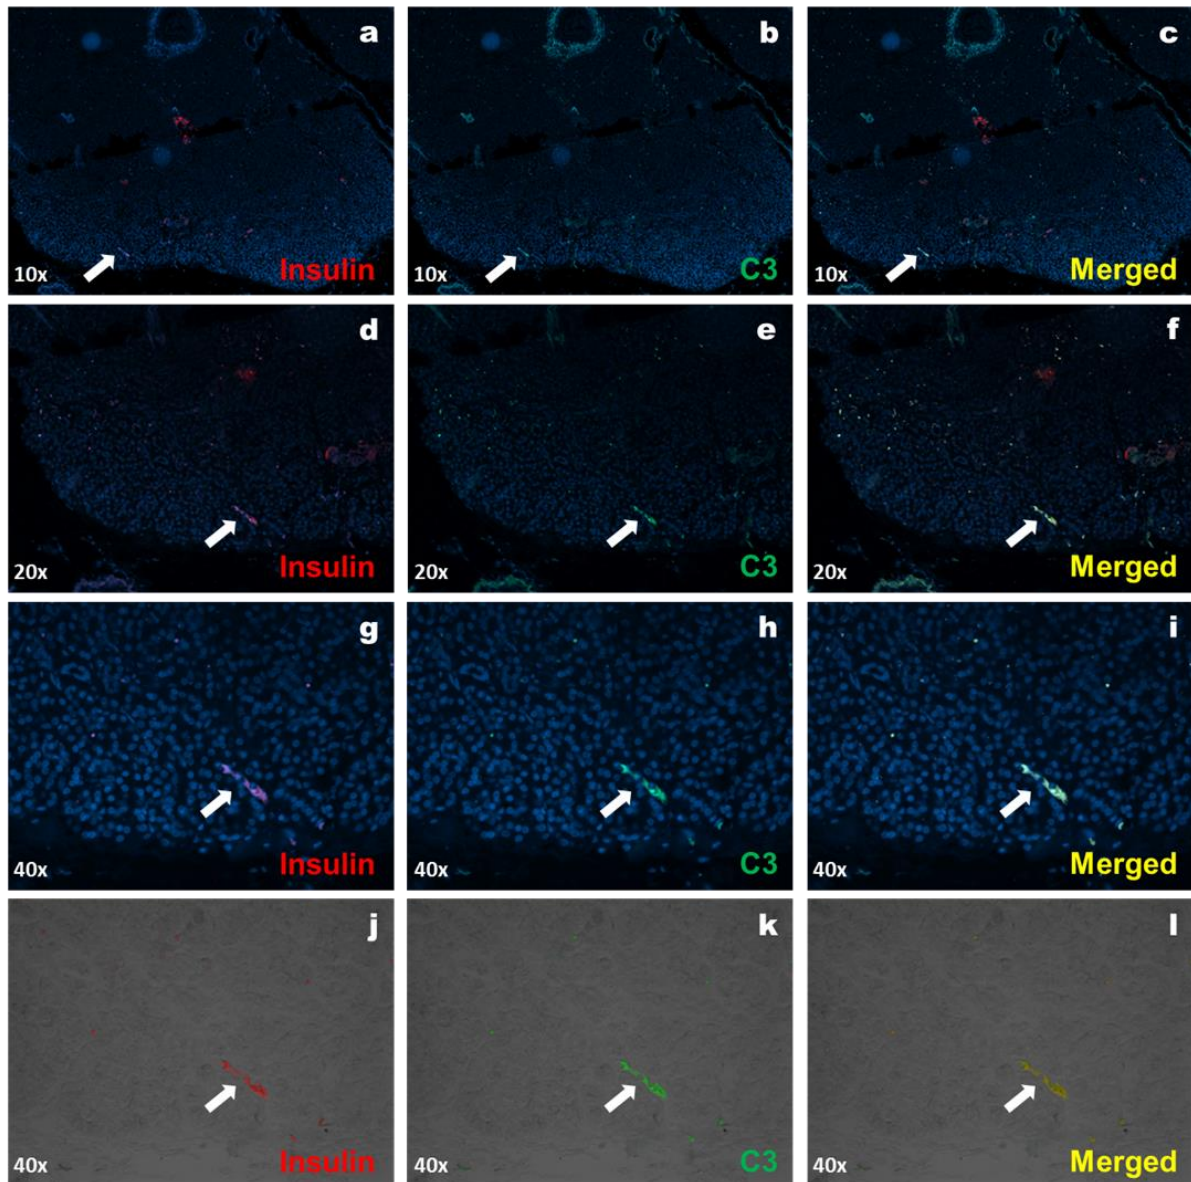

**Supplemental Figure 3. C3 expression in pancreas section from a type 1 diabetic donor**

(a-l) Pancreas sections from a type 1 diabetic patient from the University of Pisa cohort were stained for insulin (a,d,g,j; red), C3 (b,e,h,k; green), and merged (c,f,i,l; yellow). (a-i) DAPI staining is shown in blue. White arrows indicate cluster positive for both insulin and C3. Images are representative of three individuals with type 1 diabetes (same as depicted in the Fig. 3g-i of the main manuscript). Images are shown at 10x (a-c), 20x (d-f), 40x (g-i) magnification, and 40x bright field (j-l).

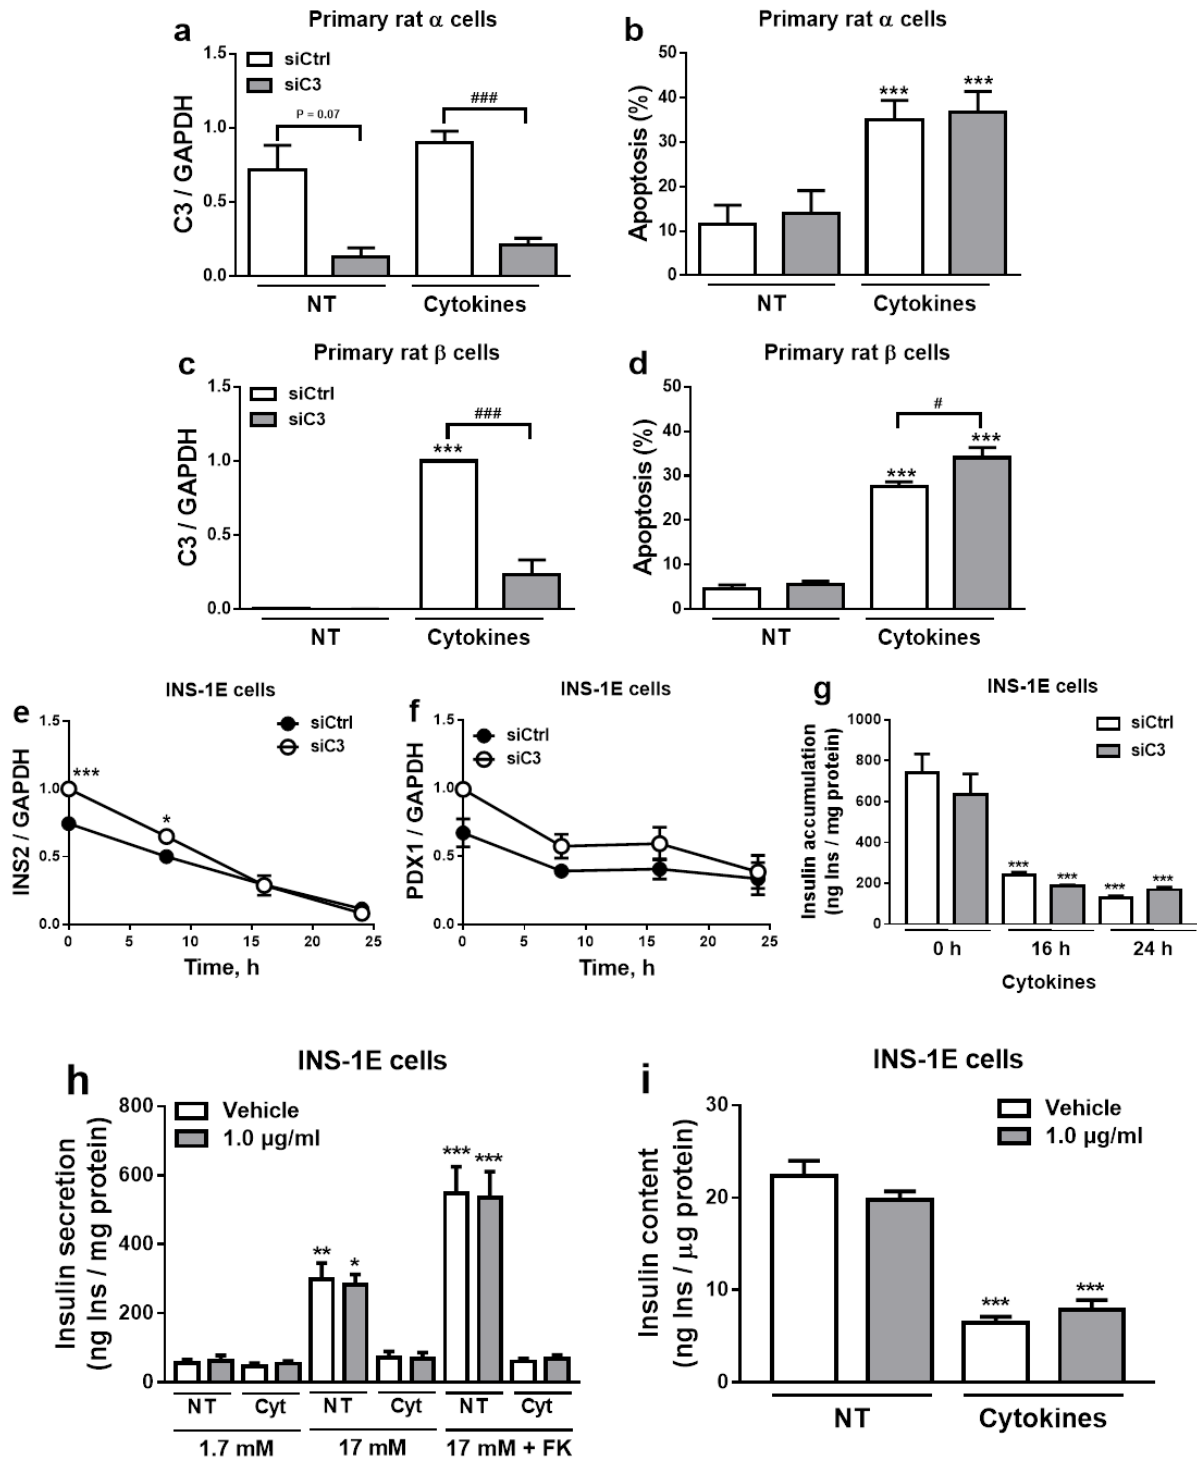

**Supplemental Figure 4. C3 inhibition in primary rat  $\alpha$ - and  $\beta$ -cells, and  $\beta$ -cell function analysis in C3-silenced cells.**

(a-d) Primary rat  $\alpha$ - and  $\beta$ -cells were transfected with siCtrl or siRNA targeting rat C3 (siC3#1). Cells were then left untreated (NT) or treated with IL-1 $\beta$  + IFN $\gamma$  (50 and 500 units/ml, respectively) for 48 h. (a,c) C3 mRNA expression in primary rat  $\alpha$ - (a) and  $\beta$ -cells (c) was analyzed by RT-PCR and normalized by the housekeeping gene GAPDH. (b,d) Apoptosis was evaluated using HO and PI staining in primary rat  $\alpha$ - (b) and  $\beta$ -cells (d). Data represent the means  $\pm$  SEM of 4 independent experiments; \*\*\* $P$ <0.001 vs. non-treated with

cytokines (NT) and transfected with the same siRNA; # $P \leq 0.05$ , and ### $P < 0.001$  as indicated by bars; ANOVA followed by Student  $t$  test with Bonferroni correction. **(e-g)** INS-1E cells were transfected with siCtrl (C) or siRNA targeting rat C3 (siC3#1, C3). Cells were then left untreated or treated with IL-1 $\beta$  + IFN $\gamma$  (10 and 100 units/ml, respectively) as indicated in the figure. **(e,f)** INS2 **(e)** and PDX1 **(f)** mRNA expression was analyzed by RT-PCR and normalized by the housekeeping gene GAPDH during a time-course study. **(g)** Medium insulin accumulation was measured by ELISA. Data represent the means  $\pm$  SEM of 4-5 independent experiments; \* $P < 0.05$  and \*\*\* $P < 0.001$  vs. transfected with siCtrl **(e,f)** or vs. non-treated with cytokines (0 h) and transfected with the same siRNA **(g)**; # $P \leq 0.05$ , and ### $P < 0.001$  as indicated by bars; ANOVA followed by Student  $t$  test with Bonferroni correction. **(h,i)** Cells were left untreated (NT) or treated with IL-1 $\beta$  + IFN $\gamma$  in the absence or presence of exogenously added C3 (1.0  $\mu$ g/ml) for 24 h. **(h)** Insulin secretion after 30 min of incubation with 1.7 mM glucose, 17 mM glucose, or 17 mM glucose plus forskolin (20  $\mu$ M). **(i)** Insulin content in cell-free lysates. Insulin secretion and insulin content were measured by ELISA. Data represent the means  $\pm$  SEM of 3 independent experiments; \* $P < 0.05$ , \*\* $P < 0.01$  and \*\*\* $P < 0.001$  vs. non-treated with cytokines (NT) and incubated at 1.7 mM glucose.

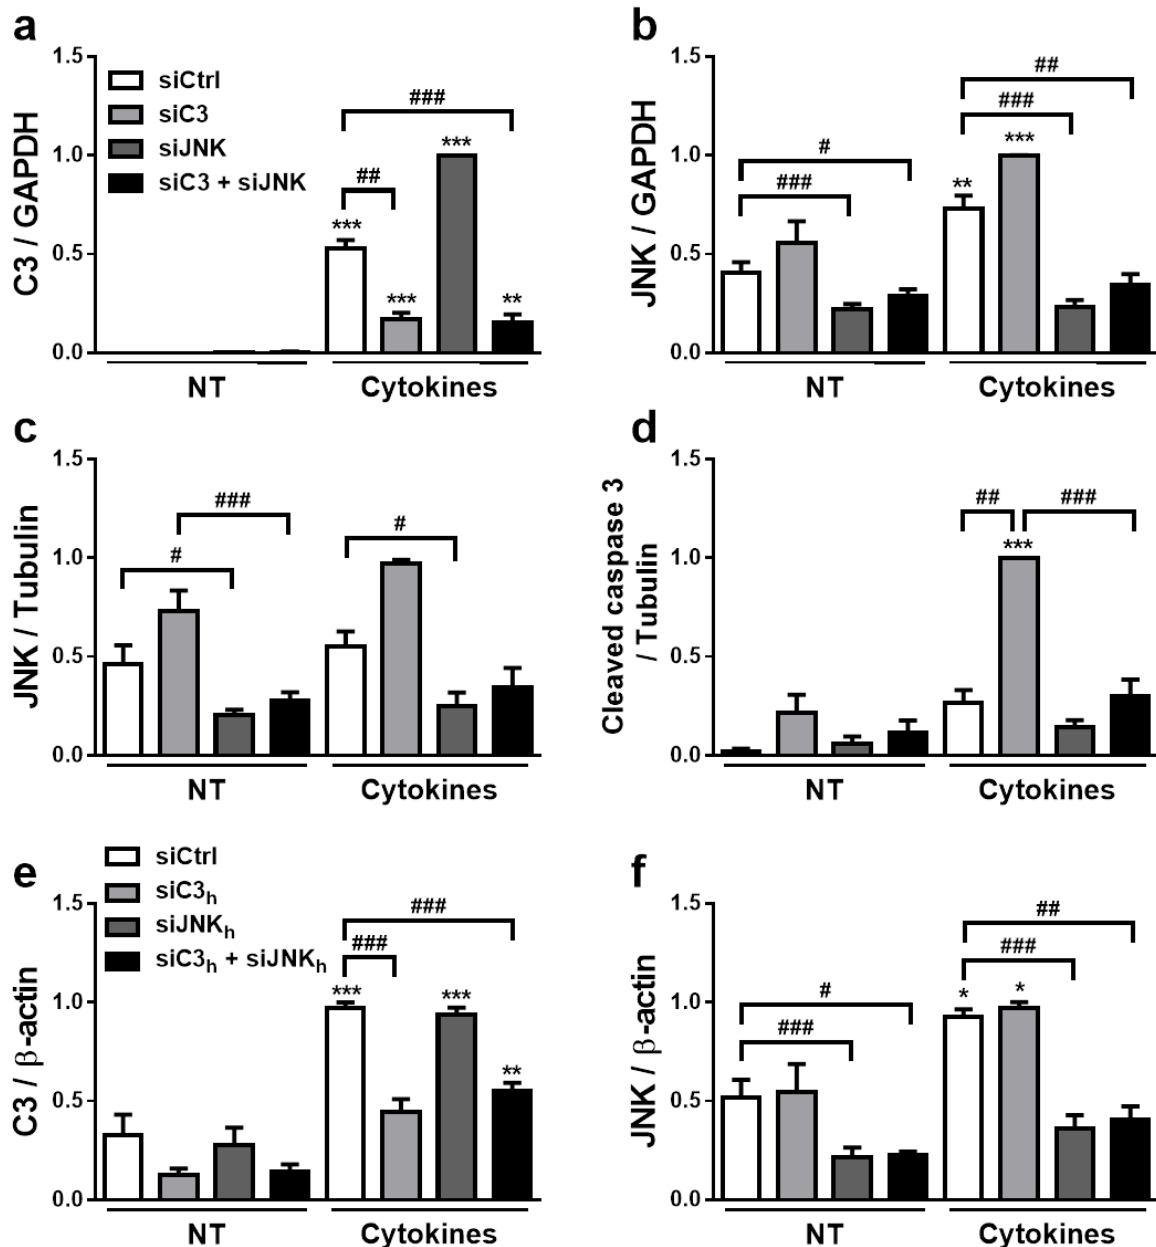

**Supplemental Figure 5. Confirmation of C3 and JNK knockdown and cleaved caspase 3 quantification.**

(a-d) INS-1E cells were transfected with siCtrl, siC3#1, siJNK, or a combination of siC3#1 and siJNK1. Cells were then left untreated or treated with IL-1 $\beta$  + IFN $\gamma$  (10 and 100 units/ml, respectively) for 16 h. Expression of C3 (a) and JNK (b) mRNAs was analyzed by RT-PCR and normalized by the housekeeping gene GAPDH. (c,d) Quantification of the western blots for JNK (c) and cleaved caspase 3 (d) shown in Figure 7. (e,f) Dispersed human islets were transfected with siCtrl, siC3#2<sub>h</sub>, siJNK<sub>h</sub>, or a combination of siC3#2<sub>h</sub> and siJNK1<sub>h</sub>. Cells were then left untreated or treated with IL-1 $\beta$  + IFN $\gamma$  (50 and 1,000 units/ml, respectively) for 48 h. Expression of C3 (e) and JNK (f) mRNAs were analyzed by RT-PCR and normalized by the housekeeping gene  $\beta$ -actin. Data represent the means  $\pm$  SEM of 3-6 independent experiments; \* $P$ <0.05, \*\* $P$ <0.01, and \*\*\* $P$ <0.001 vs. non-treated with cytokines (NT) and transfected with the same siRNA; # $P$ <0.05, ## $P$ <0.01 and ### $P$ <0.001 as indicated by bars; ANOVA followed by Student  $t$  test with Bonferroni correction.



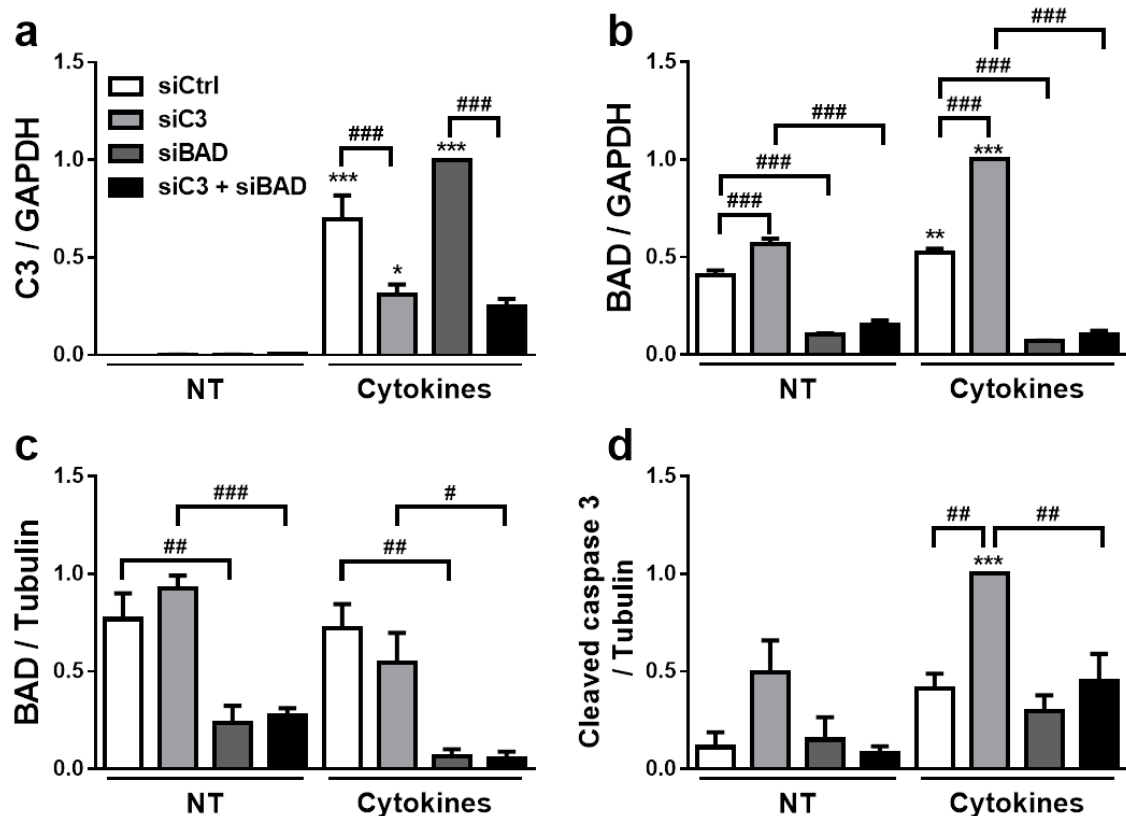

**Supplemental Figure 6. Confirmation of C3 and BAD knockdown and cleaved caspase 3 quantification.**

(a-d) INS-1E cells were transfected with siCtrl, siC3#1, siBAD, or a combination of siC3#1 and siBAD. Cells were then left untreated or treated with IL-1 $\beta$  + IFN $\gamma$  (10 and 100 units/ml, respectively) for 16 h. C3 (a) and BAD (b) mRNA expression were analyzed by RT-PCR and normalized by the housekeeping gene GAPDH. (c,d) Quantification of the western blots for BAD (c) and cleaved caspase 3 (d) shown in Figure 8. (e) INS-1E cells exposed to siCtrl or siC3 (siC3#1) were treated with vehicle only (DMSO, Ctrl) or Forskolin (20  $\mu$ M) in the absence (NT) or presence of IL-1 $\beta$  + IFN $\gamma$  (10 and 100 units/ml, respectively) for 16 h. (e) C3 mRNA expression was analyzed by RT-PCR and normalized by the housekeeping gene GAPDH. (f) siCtrl and siC3#1 INS-1E cells were infected with a control adenovirus encoding luciferase (adLuc) or with an adenovirus encoding myr-Akt1 (adAKT). Cells were then left untreated (NT) or treated with IL-1 $\beta$  + IFN $\gamma$  (10 and 100 units/ml, respectively) for 16 h. (f) C3 mRNA expression was analyzed by RT-PCR and normalized by the housekeeping gene GAPDH. Data represent the means  $\pm$  SEM of 3-4 independent experiments; \* $P$   $\leq$  0.05, \*\* $P$   $\leq$  0.01, and \*\*\* $P$   $\leq$  0.001 vs. non-treated with cytokines (NT) and transfected with the same siRNA; # $P$   $\leq$  0.05, ## $P$   $\leq$  0.01 and ### $P$   $\leq$  0.001 as indicated by bars; ANOVA followed by Student  $t$  test with Bonferroni correction.

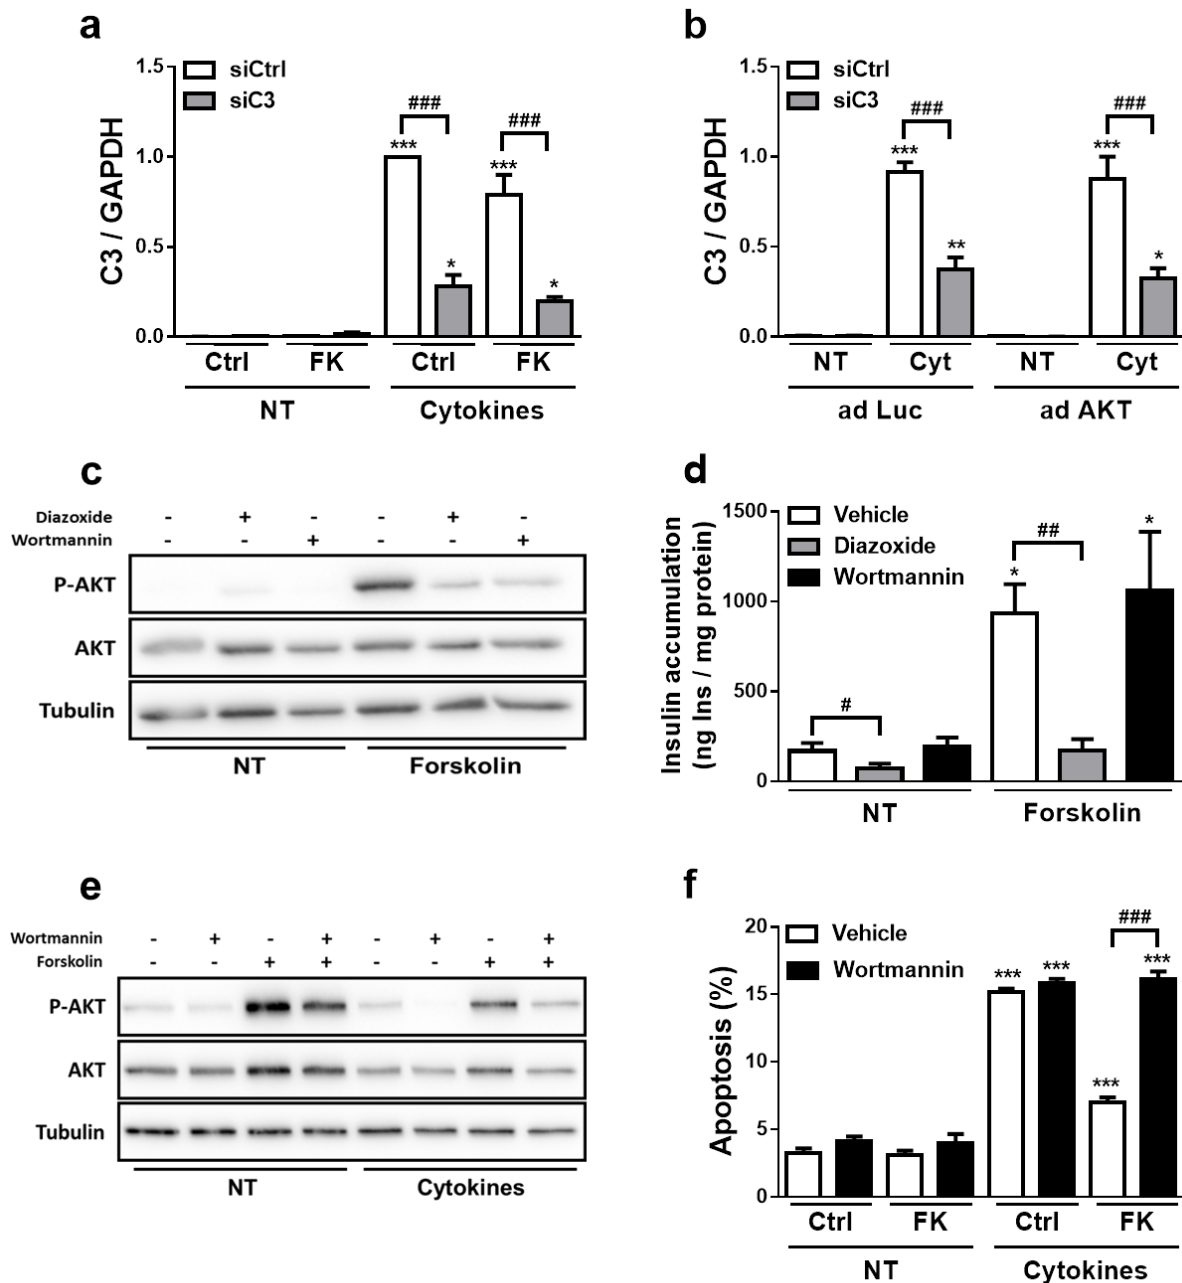

**Supplemental Figure 7. Confirmation of C3 knockdown and effects of diazoxide and wortmannin on AKT phosphorylation.**

(a) INS-1E cells were transfected with siCtrl or siC3 (siC3#1). Cells were then treated with vehicle only (DMSO, Ctrl) or Forskolin (20  $\mu$ M) in the absence (NT) or presence of IL-1 $\beta$  + IFN $\gamma$  (10 and 100 units/ml, respectively) for 16 h. (b) siCtrl and siC3#1 INS-1E cells were infected with a control adenovirus encoding luciferase (adLuc) or with an adenovirus encoding myr-Akt1 (adAKT). Cells were then left untreated (NT) or treated with IL-1 $\beta$  + IFN $\gamma$  (10 and 100 units/ml, respectively) for 16 h. C3 mRNA expression was analyzed by RT-PCR and normalized by the housekeeping gene GAPDH. Data represent the means  $\pm$  SEM of 3-4 independent experiments; \* $P$ <0.05, \*\* $P$ <0.01, and \*\*\* $P$ <0.001 vs. non-treated with cytokines (NT) and transfected with the same siRNA; #### $P$ <0.001 as indicated by bars; ANOVA followed by Student  $t$  test with Bonferroni correction. (c,d) INS-1E cells were left

untreated or treated with 200  $\mu$ M diazoxide in the absence (NT) or presence of 20  $\mu$ M forskolin for 16 h or pretreated or not for 2 h with 100 nM wortmannin and then left untreated (NT) or treated with 20  $\mu$ M forskolin for 16 h. (c) P-AKT, AKT, and  $\alpha$ -tubulin were measured by western blot. Images are representative of 4 independent experiments. (d) Medium insulin accumulation was measured by ELISA. Results are means  $\pm$  SEM; \* $P$ <0.05 vs. non-treated with forskolin (NT); # $P$ <0.05 and ## $P$ <0.01 as indicated by bars; ANOVA followed by Student t test with Bonferroni correction. (e,f) INS-1E cells were pretreated or not for 2 h with 100 nM wortmannin and then left untreated (NT) or exposed to IL-1 $\beta$  + IFN $\gamma$  (10 and 100 U/ml, respectively) and/or 20  $\mu$ M forskolin for 16 h. (e) P-AKT, AKT, and  $\alpha$ -tubulin were measured by western blot. Images are representative of 4 independent experiments. (f) Apoptosis was evaluated using HO and PI staining in INS-1E cells. Results are means  $\pm$  SEM; \*\*\* $P$ < 0.001 vs. non-treated with cytokines (NT); ### $P$ < 0.001 as indicated by bars; ANOVA followed by Student t test with Bonferroni correction.

**Supplemental Table 1. Characteristics of the human donors used in the present study for islet functional studies.**

| Date of the islet preparation    | Age (years)                  | Gender | BMI (kg/m <sup>2</sup> )     | Cause of death      | Proportion of $\beta$ -cells in the preparations (%) |
|----------------------------------|------------------------------|--------|------------------------------|---------------------|------------------------------------------------------|
| 12/12/14                         | 73                           | F      | NA                           | Cerebral hemorrhage | 22                                                   |
| 23/01/15                         | 73                           | M      | 22.8                         | Stroke              | 36                                                   |
| 01/04/15                         | 85                           | F      | 22.7                         | Cerebral hemorrhage | 51                                                   |
| 17/04/15                         | 70                           | M      | 22.6                         | Cerebral hemorrhage | 60                                                   |
| 09/07/15                         | 49                           | M      | 24.7                         | Cerebral hemorrhage | 67                                                   |
| 15/07/15                         | 64                           | F      | 21.3                         | CVD                 | 55                                                   |
| 24/07/15                         | 51                           | M      | 24.7                         | Trauma              | 60                                                   |
| 19/08/15 (1)                     | 83                           | F      | 22.5                         | Cerebral hemorrhage | 48                                                   |
| 19/08/15 (2)                     | 54                           | F      | 26.3                         | Cerebral hemorrhage | 83                                                   |
| 08/04/16                         | 72                           | M      | 27.4                         | Trauma              | 31                                                   |
| 19/05/16                         | 61                           | M      | 23.1                         | CVD                 | 50                                                   |
| 13.07.16A                        | 81                           | F      | 31.9                         | Trauma              | 67                                                   |
| 13.07.16B                        | 68                           | M      | 21.5                         | Cerebral hemorrhage | 48                                                   |
| 29/08/16                         | 79                           | M      | 27.7                         | Cerebral hemorrhage | 38                                                   |
| 21/09/16                         | 83                           | M      | 24.5                         | Trauma              | 44                                                   |
| 23/09/16                         | 75                           | M      | 22.9                         | CVD                 | 41                                                   |
| <b>Mean <math>\pm</math> SEM</b> | <b>70 <math>\pm</math> 3</b> |        | <b>24 <math>\pm</math> 1</b> |                     | <b>50 <math>\pm</math> 4</b>                         |

M: male; F: female; BMI: body mass index; CVD: cardiovascular disease.

**Supplemental Table 2. List of siRNAs used in the present study.**

| siRNA                        | Name                                                  | Distributor                                    | Sequence                                                          |
|------------------------------|-------------------------------------------------------|------------------------------------------------|-------------------------------------------------------------------|
| siCTRL                       | Allstars Negative Control siRNA                       | Qiagen, Verlo, Netherlands                     | Sequence not provided                                             |
| siC3#1 (rat)                 | Silencer® Selected s235554                            | Ambion, Life technologies Corporation, CA, USA | 5'-GGCUCAACGAGCAAAGAUAtt-3'<br>5'-UAUCUUUGCUCGUUGAGCCag -3'       |
| siC3#2 (rat)                 | Silencer® Selected s235555                            | Ambion, Life technologies Corporation, CA, USA | 5'-GGAGUAGACAGAUACAUUUtt -3'<br>5'-AAAUGUAUCUGUCUACUCCag -3'      |
| siC3 <sub>h</sub> #1 (human) | Silencer® Selected s2161                              | Ambion, Life technologies Corporation, CA, USA | 5'-GGAGUAACCUUGGAUGAGGAtt -3'<br>5'-UCCUCAUCCAGGUUACUCctg -3'     |
| siC3 <sub>h</sub> #2 (human) | Silencer® Selected s2162                              | Ambion, Life technologies Corporation, CA, USA | 5'-GAUCCGAGCCUACUAUGAAAtt -3'<br>5'-UUCAUAGUAGGCUCGGAUCtt -3'     |
| siJNK1 (rat)                 | Stealth Selected siRNAi siRNA Duplex Oligonucleotides | Invitrogen, Pasley, UK                         | 5'-AAAGAAUGUCCUACCUUCU-3'                                         |
| siJNK1 <sub>h</sub> (human)  | Stealth Selected siRNAi siRNA Duplex Oligonucleotides | Invitrogen, Pasley, UK                         | 5'-GGGCCUACAGAGAGCUAGUUCUUAU-3'<br>5'-AUAAGAACUAGCUCUCUGUAGGCC-3' |
| siBAD (rat)                  | Stealth Selected siRNAi siRNA Duplex Oligonucleotides | Invitrogen, Pasley, UK                         | 5'-GAGUAUGUCCAGAUGCCAGAGUU-3'                                     |

**Supplemental Table 3. Primers used in the present study.**

| Genes                | Forward                | Reverse                 |
|----------------------|------------------------|-------------------------|
|                      | Sequence (5'-3')       | Sequence (5'-3')        |
| Human $\beta$ -actin | TCTACGCCAACACAGTCGT    | GCTCAGGAGGAGCAATGATC    |
| Human C3             | CGATAGGAACACCCTCATCATC | CAGGCTGGATAAGCTCTACATT  |
| Human C3aR1          | GAAACCAGCCCCTGGATAA    | TGGTAGCTCAGACTCGTAGAA   |
| Human JNK1           | GGACTGCAGGAACGAGTTTT   | CAACTGACCAAATGTCAACG    |
| Rat GAPDH            | AGTTCAACGGCACAGTCAAG   | TACTCAGCACCAGCATCACC    |
| Rat C3               | AGTGCAGAAACGCCCTAAA    | CGTGCCTTCCCAATGATGTA    |
| Rat C3aR1            | TTGCCTCCATGGTCATTCTC   | TTCACGGTCCTCTTCATCTTTAC |
| Rat CCL2             | TAGCATCCACGTGCTGTCTC   | TGCTGCTGGTGATTCTCTTG    |
| Rat CCL5             | CCAGAGAAGAAGTGGGTTC    | AGCAAGCAATGACAGGAAAG    |
| Rat CXCL10           | GCAAGTCTATCCTGTCCGCAT  | GGGTAAAGGGAGGTGGAGAGA   |
| Rat INS2             | TGTGGTTCTCACTTGGTGGA   | CTCCAGTTGTGCCACTTGTG    |
| Rat c-Jun            | CGTTCCTCCAGTCCGAGA     | AAGGTCCGAGTTCTTGGCT     |
| Rat JNK              | CTAAGCGAGCCTACCGAGAA   | GCAAAGATTGCATCCATGA     |
| Rat BAD              | CCAATAACAGTCATCATGGAG  | GTCTCGAAAAGGGCTAAG      |
| Rat PDX1             | GGTATAGCCAGCGAGATGCT   | TCAGTTGGGAGCCTGATTCT    |

**Supplemental Table 4. Antibodies used in the present study.**

| Peptide/protein target             | Antigen sequence (if known) | Name of Antibody                                    | Manufacturer, catalog #, and/or name of individual providing the antibody | Species raised in      | Dilution                   | RRID        |
|------------------------------------|-----------------------------|-----------------------------------------------------|---------------------------------------------------------------------------|------------------------|----------------------------|-------------|
| <b>C3</b>                          | NA                          | Anti-C3 antibody                                    | Abcam, Cambridge, UK, Cat#: ab97462                                       | Rabbit, polyclonal     | 1:1000 (WB) or 1:100 (ICC) | AB_10679468 |
| <b>Cleaved caspase 3</b>           | NA                          | Cleaved Caspase-3 (Asp175)                          | Cell signalling, Danvers, MA, UK, Cat#: 9661                              | Rabbit, polyclonal     | 1:1000                     | AB_2341188  |
| <b>Phospho-SAPK/JNK</b>            | NA                          | Phospho-SAPK/JNK (Thr183/Tyr185) Antibody           | Cell signalling, Danvers, MA, UK, Cat#: 9251                              | Rabbit, polyclonal     | 1:1000                     | AB_331659   |
| <b>JNK1</b>                        | NA                          | JNK1 (2C6) Mouse mAb                                | Cell signalling, Danvers, MA, UK, Cat#: 3708S                             | Mouse, monoclonal      | 1:1000                     | AB_1904132  |
| <b>Phospho-AKT</b>                 | NA                          | Phospho-Akt (Ser473) (D9E) XP® Rabbit mAb           | Cell signalling, Danvers, MA, UK, Cat#: 4060                              | Rabbit, monoclonal     | 1:10000                    | AB_2315049  |
| <b>AKT</b>                         | NA                          | Akt Antibody                                        | Cell signalling, Danvers, MA, UK, Cat#: 9272                              | Rabbit, polyclonal     | 1:5000                     | AB_329827   |
| <b>Phospho-BAD</b>                 | NA                          | Phospho-Bad (Ser136) (D25H8) Rabbit mAb             | Cell signalling, Danvers, MA, UK, Cat#: 4366                              | Rabbit, monoclonal     | 1:500                      | AB_10547878 |
| <b>BAD</b>                         | NA                          | Bad Antibody                                        | Cell signalling, Danvers, MA, UK, Cat#: 9292                              | Unknown                | 1:500                      | AB_331419   |
| <b>Glucagon</b>                    | NA                          | Monoclonal Anti-Glucagon antibody produced in mouse | Sigma, Bornem, Belgium, Cat#: G2654                                       | Mouse, monoclonal      | 1:1000                     | AB_259852   |
| <b>Insulin</b>                     | NA                          | Monoclonal Anti-Insulin antibody produced in mouse  | Sigma, Bornem, Belgium, Cat#: I2018                                       | Mouse, monoclonal      | 1:1000                     | AB_260137   |
| <b>Insulin (for histology)</b>     | NA                          | Polyclonal Guinea Pig Anti- Insulin antibody        | DAKO, Glostrup, Denmark, Cat# A056401-2                                   | Guinea pig, polyclonal | 1:250                      | AB_2617169  |
| <b>Insulin (for histology)</b>     | NA                          | Guinea Pig Anti-Insulin Polyclonal Antibody         | Abcam, Cambridge, UK, Cat# ab7842                                         | Guinea pig, polyclonal | 1:100                      | AB_306130   |
| <b><math>\alpha</math>-Tubulin</b> | NA                          | Monoclonal Anti- $\alpha$ -Tubulin antibody         | Sigma, Bornem, Belgium, Cat#: T9026                                       | Mouse, monoclonal      | 1:5000                     | AB_477593   |

|                                 |    |                                                                                          |                                                                            |                    |        |                                   |
|---------------------------------|----|------------------------------------------------------------------------------------------|----------------------------------------------------------------------------|--------------------|--------|-----------------------------------|
| <b>Anti-mouse IgG</b>           | NA | Peroxidase AffiniPure F(ab') <sub>2</sub> Fragment Donkey Anti-Mouse IgG (H+L)           | Jackson ImmunoResearch Laboratories, Wes Grove, PA, USA, Cat#: 715-036-150 | Polyclonal         | 1:5000 | AB_2340773                        |
| <b>Anti-rabbit IgG</b>          | NA | Peroxidase AffiniPure F(ab') <sub>2</sub> Fragment Donkey Anti-Rabbit IgG (H+L)          | Jackson ImmunoResearch Laboratories, Wes Grove, PA, USA, Cat#: 711-036-152 | Polyclonal         | 1:5000 | AB_2340590                        |
| <b>Goat anti-mouse IgG</b>      | NA | Goat anti-Mouse IgG (H+L) Highly Cross-Adsorbed Secondary Antibody, Alexa Fluor 488      | Life technologies, USA, Cat#: A11029                                       | Goat, polyclonal   | 1:1000 | AB_2534088                        |
| <b>Goat anti-guinea pig IgG</b> | NA | Goat anti-Guinea Pig IgG (H+L) Highly Cross-Adsorbed Secondary Antibody, Alexa Fluor 488 | Life technologies, USA, Cat#: A11073                                       | Goat, polyclonal   | 1:1000 | AB_2534117                        |
| <b>Donkey anti-rabbit IgG</b>   | NA | Alexa Fluor 488-AffiniPure Donkey Anti-Rabbit IgG (H+L) Antibody                         | Jackson ImmunoResearch Laboratories, Wes Grove, PA, USA, Cat#: 711-545-152 | Donkey, polyclonal | 1:200  | AB_2313584                        |
| <b>Donkey anti-guinea pig</b>   | NA | DyLight 594-conjugated AffiniPure Donkey Anti-Guinea Pig                                 | Jackson ImmunoResearch Laboratories, Wes Grove, PA, USA, Cat#: 706-515-148 | Donkey, polyclonal | 1:200  | The product has been discontinued |
| <b>Goat anti-rabbit IgG</b>     | NA | Goat anti-Rabbit IgG (H+L) Highly Cross-Adsorbed Secondary Antibody, Alexa Fluor 568     | Life technologies, USA, Cat#: A11036                                       | Goat, polyclonal   | 1:1000 | AB_2534094                        |

NA: Not available



**Supplemental Table 5. Characteristics of the non-diabetic and type 1 diabetic donors used for histology.**

| <b>Patient</b> | <b>Age (years)</b> | <b>Gender</b> | <b>Disease duration (Years)</b> | <b>Cause of death</b> | <b>Source</b>      |
|----------------|--------------------|---------------|---------------------------------|-----------------------|--------------------|
| <b>ND 1</b>    | 63                 | F             | -                               | CVD                   | University of Pisa |
| <b>ND 2</b>    | 88                 | M             | -                               | CVD                   | University of Pisa |
| <b>ND 3</b>    | 32                 | F             | -                               | Unknown               | nPOD, CID: 6034    |
| <b>ND 4</b>    | 68                 | F             | -                               | Unknown               | nPOD, CID: 6012    |
| <b>T1D 1</b>   | 73                 | M             | 10                              | CVD                   | University of Pisa |
| <b>T1D 2</b>   | 61                 | F             | Unknown                         | CVD                   | University of Pisa |
| <b>T1D 3</b>   | 23                 | M             | 7                               | Unknown               | nPOD, CID: 6069    |

ND: non-diabetic donor; T1D: type 1 diabetic donor; M: male; F: female; CVD: cardiovascular disease; CID: case identification number.

**Supplemental Table 6. List with the descriptions of the genes/proteins in the C3 1<sup>st</sup> order network (Network Collection #2).**

| Gene name     | UniProt Accession | UniProt Description                      |
|---------------|-------------------|------------------------------------------|
| <b>ACKR3</b>  | P25106            | Atypical chemokine receptor 3            |
| <b>ADORA1</b> | P30542            | Adenosine receptor A1                    |
| <b>ADORA3</b> | P0DMS8            | Adenosine receptor A3                    |
| <b>ADRA2A</b> | P08913            | Alpha-2A adrenergic receptor             |
| <b>ADRA2B</b> | P18089            | Alpha-2B adrenergic receptor             |
| <b>ADRA2C</b> | P18825            | Alpha-2C adrenergic receptor             |
| <b>AGT</b>    | P01019            | Angiotensinogen                          |
| <b>AGTR2</b>  | P50052            | Type-2 angiotensin II receptor           |
| <b>ANXA1</b>  | P04083            | Annexin A1                               |
| <b>APLN</b>   | Q9ULZ1            | Apelin                                   |
| <b>APLNR</b>  | P35414            | Apelin receptor                          |
| <b>APP</b>    | P05067            | Amyloid beta A4 protein                  |
| <b>BDKRB1</b> | P46663            | B1 bradykinin receptor                   |
| <b>BDKRB2</b> | P30411            | B2 bradykinin receptor                   |
| <b>C2</b>     | P06681            | Complement C2                            |
| <b>C3</b>     | P01024            | Complement C3                            |
| <b>C3AR1</b>  | Q16581            | C3a anaphylatoxin chemotactic receptor   |
| <b>C4A</b>    | P0C0L4            | Complement C4-A                          |
| <b>C4B</b>    | P0C0L5            | Complement C4-B                          |
| <b>C5</b>     | P01031            | Complement C5                            |
| <b>C5AR1</b>  | P21730            | C5a anaphylatoxin chemotactic receptor 1 |
| <b>CASR</b>   | P41180            | Extracellular calcium-sensing receptor   |
| <b>CCL15</b>  | Q16663            | C-C motif chemokine 15                   |
| <b>CCL16</b>  | O15467            | C-C motif chemokine 16                   |
| <b>CCL19</b>  | Q99731            | C-C motif chemokine 19                   |
| <b>CCL20</b>  | P78556            | C-C motif chemokine 20                   |
| <b>CCL21</b>  | O00585            | C-C motif chemokine 21                   |

|              |        |                                       |
|--------------|--------|---------------------------------------|
| <b>CCL23</b> | P55773 | C-C motif chemokine 23                |
| <b>CCL25</b> | O15444 | C-C motif chemokine 25                |
| <b>CCL27</b> | Q9Y4X3 | C-C motif chemokine 27                |
| <b>CCL28</b> | Q9NRJ3 | C-C motif chemokine 28                |
| <b>CCL5</b>  | P13501 | C-C motif chemokine 5                 |
| <b>CCR1</b>  | P32246 | C-C chemokine receptor type 1         |
| <b>CCR10</b> | P46092 | C-C chemokine receptor type 10        |
| <b>CCR2</b>  | P41597 | C-C chemokine receptor type 2         |
| <b>CCR3</b>  | P51677 | C-C chemokine receptor type 3         |
| <b>CCR4</b>  | P51679 | C-C chemokine receptor type 4         |
| <b>CCR5</b>  | P51681 | C-C chemokine receptor type 5         |
| <b>CCR6</b>  | P51684 | C-C chemokine receptor type 6         |
| <b>CCR7</b>  | P32248 | C-C chemokine receptor type 7         |
| <b>CCR8</b>  | P51685 | C-C chemokine receptor type 8         |
| <b>CCR9</b>  | P51686 | C-C chemokine receptor type 9         |
| <b>CD19</b>  | P15391 | B-lymphocyte antigen CD19             |
| <b>CD46</b>  | P15529 | Membrane cofactor protein             |
| <b>CD55</b>  | P08174 | Complement decay-accelerating factor  |
| <b>CD81</b>  | P60033 | CD81 antigen                          |
| <b>CFB</b>   | P00751 | Complement factor B                   |
| <b>CFD</b>   | P00746 | Complement factor D                   |
| <b>CFH</b>   | P08603 | Complement factor H                   |
| <b>CFHR3</b> | Q02985 | Complement factor H-related protein 3 |
| <b>CFHR4</b> | Q92496 | Complement factor H-related protein 4 |
| <b>CFHR5</b> | Q9BXR6 | Complement factor H-related protein 5 |
| <b>CFI</b>   | P05156 | Complement factor I                   |
| <b>CFP</b>   | P27918 | Properdin                             |
| <b>CHRM2</b> | P08172 | Muscarinic acetylcholine receptor M2  |
| <b>CHRM4</b> | P08173 | Muscarinic acetylcholine receptor M4  |

|               |        |                                              |
|---------------|--------|----------------------------------------------|
| <b>CNR1</b>   | P21554 | Cannabinoid receptor 1                       |
| <b>CNR2</b>   | P34972 | Cannabinoid receptor 2                       |
| <b>CPN1</b>   | P15169 | Carboxypeptidase N catalytic chain           |
| <b>CR1</b>    | P17927 | Complement receptor type 1                   |
| <b>CR1L</b>   | Q2VPA4 | Complement component receptor 1-like protein |
| <b>CR2</b>    | P20023 | Complement receptor type 2                   |
| <b>CXCL1</b>  | P09341 | Growth-regulated alpha protein               |
| <b>CXCL10</b> | P02778 | C-X-C motif chemokine 10                     |
| <b>CXCL11</b> | O14625 | C-X-C motif chemokine 11                     |
| <b>CXCL12</b> | P48061 | Stromal cell-derived factor 1                |
| <b>CXCL13</b> | O43927 | C-X-C motif chemokine 13                     |
| <b>CXCL16</b> | Q9H2A7 | C-X-C motif chemokine 16                     |
| <b>CXCL2</b>  | P19875 | C-X-C motif chemokine 2                      |
| <b>CXCL3</b>  | P19876 | C-X-C motif chemokine 3                      |
| <b>CXCL5</b>  | P42830 | C-X-C motif chemokine 5                      |
| <b>CXCL6</b>  | P80162 | C-X-C motif chemokine 6                      |
| <b>CXCL8</b>  | P10145 | Interleukin-8                                |
| <b>CXCL9</b>  | Q07325 | C-X-C motif chemokine 9                      |
| <b>CXCR1</b>  | P25024 | C-X-C chemokine receptor type 1              |
| <b>CXCR2</b>  | P25025 | C-X-C chemokine receptor type 2              |
| <b>CXCR3</b>  | P49682 | C-X-C chemokine receptor type 3              |
| <b>CXCR4</b>  | P61073 | C-X-C chemokine receptor type 4              |
| <b>CXCR5</b>  | P32302 | C-X-C chemokine receptor type 5              |
| <b>CXCR6</b>  | O00574 | C-X-C chemokine receptor type 6              |
| <b>DRD2</b>   | P14416 | D(2) dopamine receptor                       |
| <b>DRD3</b>   | P35462 | D(3) dopamine receptor                       |
| <b>DRD4</b>   | P21917 | D(4) dopamine receptor                       |
| <b>FPR1</b>   | P21462 | fMet-Leu-Phe receptor                        |
| <b>FPR2</b>   | P25090 | N-formyl peptide receptor 2                  |

|               |        |                                                                   |
|---------------|--------|-------------------------------------------------------------------|
| <b>FPR3</b>   | P25089 | N-formyl peptide receptor 3                                       |
| <b>GABBR1</b> | Q9UBS5 | Gamma-aminobutyric acid type B receptor subunit 1                 |
| <b>GABBR2</b> | O75899 | Gamma-aminobutyric acid type B receptor subunit 2                 |
| <b>GAL</b>    | P22466 | Galanin peptides                                                  |
| <b>GALR1</b>  | P47211 | Galanin receptor type 1                                           |
| <b>GALR2</b>  | O43603 | Galanin receptor type 2                                           |
| <b>GALR3</b>  | O60755 | Galanin receptor type 3                                           |
| <b>GNAI1</b>  | P63096 | Guanine nucleotide-binding protein G(i) subunit alpha-1           |
| <b>GNAI2</b>  | P04899 | Guanine nucleotide-binding protein G(i) subunit alpha-2           |
| <b>GNAI3</b>  | P08754 | Guanine nucleotide-binding protein G(k) subunit alpha             |
| <b>GNAT1</b>  | P11488 | Guanine nucleotide-binding protein G(t) subunit alpha-1           |
| <b>GNAT2</b>  | P19087 | Guanine nucleotide-binding protein G(t) subunit alpha-2           |
| <b>GNAT3</b>  | A8MTJ3 | Guanine nucleotide-binding protein G(t) subunit alpha-3           |
| <b>GNB1</b>   | P62873 | Guanine nucleotide-binding protein G(I)/G(S)/G(T) subunit beta-1  |
| <b>GNG2</b>   | P59768 | Guanine nucleotide-binding protein G(I)/G(S)/G(O) subunit gamma-2 |
| <b>GPER1</b>  | Q99527 | G-protein coupled estrogen receptor 1                             |
| <b>GPR17</b>  | Q13304 | Uracil nucleotide/cysteinyl leukotriene receptor                  |
| <b>GPR18</b>  | Q14330 | N-arachidonyl glycine receptor                                    |
| <b>GPR55</b>  | Q9Y2T6 | G-protein coupled receptor 55                                     |
| <b>GRM2</b>   | Q14416 | Metabotropic glutamate receptor 2                                 |
| <b>GRM3</b>   | Q14832 | Metabotropic glutamate receptor 3                                 |
| <b>GRM4</b>   | Q14833 | Metabotropic glutamate receptor 4                                 |
| <b>GRM6</b>   | O15303 | Metabotropic glutamate receptor 6                                 |
| <b>GRM7</b>   | Q14831 | Metabotropic glutamate receptor 7                                 |
| <b>GRM8</b>   | O00222 | Metabotropic glutamate receptor 8                                 |
| <b>HCAR1</b>  | Q9BXC0 | Hydroxycarboxylic acid receptor 1                                 |
| <b>HCAR2</b>  | Q8TDS4 | Hydroxycarboxylic acid receptor 2                                 |
| <b>HCAR3</b>  | P49019 | Hydroxycarboxylic acid receptor 3                                 |
| <b>HEBP1</b>  | Q9NRV9 | Heme-binding protein 1                                            |

|                |        |                                            |
|----------------|--------|--------------------------------------------|
| <b>HNF4A</b>   | P41235 | Hepatocyte nuclear factor 4-alpha          |
| <b>HRH3</b>    | Q9Y5N1 | Histamine H3 receptor                      |
| <b>HRH4</b>    | Q9H3N8 | Histamine H4 receptor                      |
| <b>HTR1A</b>   | P08908 | 5-hydroxytryptamine receptor 1A            |
| <b>HTR1B</b>   | P28222 | 5-hydroxytryptamine receptor 1B            |
| <b>HTR1D</b>   | P28221 | 5-hydroxytryptamine receptor 1D            |
| <b>HTR1E</b>   | P28566 | 5-hydroxytryptamine receptor 1E            |
| <b>HTR1F</b>   | P30939 | 5-hydroxytryptamine receptor 1F            |
| <b>HTR5A</b>   | P47898 | 5-hydroxytryptamine receptor 5A            |
| <b>IFITM1</b>  | P13164 | Interferon-induced transmembrane protein 1 |
| <b>IFITM2</b>  | Q01629 | Interferon-induced transmembrane protein 2 |
| <b>IFITM3</b>  | Q01628 | Interferon-induced transmembrane protein 3 |
| <b>INSL5</b>   | Q9Y5Q6 | Insulin-like peptide INSL5                 |
| <b>ITGAX</b>   | P20702 | Integrin alpha-X                           |
| <b>ITGB2</b>   | P05107 | Integrin beta-2                            |
| <b>KNG1</b>    | P01042 | Kininogen-1                                |
| <b>LPAR1</b>   | Q92633 | Lysophosphatidic acid receptor 1           |
| <b>LPAR2</b>   | Q9HBW0 | Lysophosphatidic acid receptor 2           |
| <b>LPAR3</b>   | Q9UBY5 | Lysophosphatidic acid receptor 3           |
| <b>LPAR5</b>   | Q9H1C0 | Lysophosphatidic acid receptor 5           |
| <b>MCHR1</b>   | Q99705 | Melanin-concentrating hormone receptor 1   |
| <b>MCHR2</b>   | Q969V1 | Melanin-concentrating hormone receptor 2   |
| <b>MT-RNR2</b> | Q8IVG9 | Humanin                                    |
| <b>MTNR1A</b>  | P48039 | Melatonin receptor type 1A                 |
| <b>MTNR1B</b>  | P49286 | Melatonin receptor type 1B                 |
| <b>NMS</b>     | Q5H8A3 | Neuromedin-S                               |
| <b>NMU</b>     | P48645 | Neuromedin-U                               |
| <b>NMUR1</b>   | Q9HB89 | Neuromedin-U receptor 1                    |
| <b>NMUR2</b>   | Q9GZQ4 | Neuromedin-U receptor 2                    |

|               |        |                                   |
|---------------|--------|-----------------------------------|
| <b>NPB</b>    | Q8NG41 | Neuropeptide B                    |
| <b>NPBWR1</b> | P48145 | Neuropeptides B/W receptor type 1 |
| <b>NPBWR2</b> | P48146 | Neuropeptides B/W receptor type 2 |
| <b>NPW</b>    | Q8N729 | Neuropeptide W                    |
| <b>NPY</b>    | P01303 | Pro-neuropeptide Y                |
| <b>NPY1R</b>  | P25929 | Neuropeptide Y receptor type 1    |
| <b>NPY2R</b>  | P49146 | Neuropeptide Y receptor type 2    |
| <b>NPY4R</b>  | P50391 | Neuropeptide Y receptor type 4    |
| <b>NPY5R</b>  | Q15761 | Neuropeptide Y receptor type 5    |
| <b>OPRD1</b>  | P41143 | Delta-type opioid receptor        |
| <b>OPRK1</b>  | P41145 | Kappa-type opioid receptor        |
| <b>OPRL1</b>  | P41146 | Nociceptin receptor               |
| <b>OPRM1</b>  | P35372 | Mu-type opioid receptor           |
| <b>OXER1</b>  | Q8TDS5 | Oxoeicosanoid receptor 1          |
| <b>OXGR1</b>  | Q96P68 | 2-oxoglutarate receptor 1         |
| <b>P2RY12</b> | Q9H244 | P2Y purinoceptor 12               |
| <b>P2RY13</b> | Q9BPV8 | P2Y purinoceptor 13               |
| <b>P2RY14</b> | Q15391 | P2Y purinoceptor 14               |
| <b>P2RY4</b>  | P51582 | P2Y purinoceptor 4                |
| <b>PDYN</b>   | P01213 | Proenkephalin-B                   |
| <b>PENK</b>   | P01210 | Proenkephalin-A                   |
| <b>PF4</b>    | P02776 | Platelet factor 4                 |
| <b>PF4V1</b>  | P10720 | Platelet factor 4 variant         |
| <b>PMCH</b>   | P20382 | Pro-MCH                           |
| <b>PNOC</b>   | Q13519 | Prepronociceptin                  |
| <b>POMC</b>   | P01189 | Pro-opiomelanocortin              |
| <b>PPBP</b>   | P02775 | Platelet basic protein            |
| <b>PPY</b>    | P01298 | Pancreatic prohormone             |
| <b>PTGDR2</b> | Q9Y5Y4 | Prostaglandin D2 receptor 2       |

|                |        |                                       |
|----------------|--------|---------------------------------------|
| <b>PTGER3</b>  | P43115 | Prostaglandin E2 receptor EP3 subtype |
| <b>PYY</b>     | P10082 | Peptide YY                            |
| <b>RELA</b>    | Q04206 | Transcription factor p65              |
| <b>RLN3</b>    | Q8WXF3 | Relaxin-3                             |
| <b>RXFP3</b>   | Q9NSD7 | Relaxin-3 receptor 1                  |
| <b>RXFP4</b>   | Q8TDU9 | Relaxin-3 receptor 2                  |
| <b>S1PR1</b>   | P21453 | Sphingosine 1-phosphate receptor 1    |
| <b>S1PR2</b>   | O95136 | Sphingosine 1-phosphate receptor 2    |
| <b>S1PR3</b>   | Q99500 | Sphingosine 1-phosphate receptor 3    |
| <b>S1PR4</b>   | O95977 | Sphingosine 1-phosphate receptor 4    |
| <b>S1PR5</b>   | Q9H228 | Sphingosine 1-phosphate receptor 5    |
| <b>SAA1</b>    | P0DJ18 | Serum amyloid A-1 protein             |
| <b>SST</b>     | P61278 | Somatostatin                          |
| <b>SSTR1</b>   | P30872 | Somatostatin receptor type 1          |
| <b>SSTR2</b>   | P30874 | Somatostatin receptor type 2          |
| <b>SSTR3</b>   | P32745 | Somatostatin receptor type 3          |
| <b>SSTR4</b>   | P31391 | Somatostatin receptor type 4          |
| <b>SSTR5</b>   | P35346 | Somatostatin receptor type 5          |
| <b>SUCNR1</b>  | Q9BXA5 | Succinate receptor 1                  |
| <b>TAS2R1</b>  | Q9NYW7 | Taste receptor type 2 member 1        |
| <b>TAS2R10</b> | Q9NYW0 | Taste receptor type 2 member 10       |
| <b>TAS2R13</b> | Q9NYV9 | Taste receptor type 2 member 13       |
| <b>TAS2R14</b> | Q9NYV8 | Taste receptor type 2 member 14       |
| <b>TAS2R16</b> | Q9NYV7 | Taste receptor type 2 member 16       |
| <b>TAS2R19</b> | P59542 | Taste receptor type 2 member 19       |
| <b>TAS2R20</b> | P59543 | Taste receptor type 2 member 20       |
| <b>TAS2R3</b>  | Q9NYW6 | Taste receptor type 2 member 3        |
| <b>TAS2R30</b> | P59541 | Taste receptor type 2 member 30       |
| <b>TAS2R31</b> | P59538 | Taste receptor type 2 member 31       |



|                |        |                                                      |
|----------------|--------|------------------------------------------------------|
| <b>TAS2R38</b> | P59533 | Taste receptor type 2 member 38                      |
| <b>TAS2R39</b> | P59534 | Taste receptor type 2 member 39                      |
| <b>TAS2R4</b>  | Q9NYW5 | Taste receptor type 2 member 4                       |
| <b>TAS2R40</b> | P59535 | Taste receptor type 2 member 40                      |
| <b>TAS2R41</b> | P59536 | Taste receptor type 2 member 41                      |
| <b>TAS2R42</b> | Q7RTR8 | Taste receptor type 2 member 42                      |
| <b>TAS2R43</b> | P59537 | Taste receptor type 2 member 43                      |
| <b>TAS2R45</b> | P59539 | Taste receptor type 2 member 45                      |
| <b>TAS2R46</b> | P59540 | Taste receptor type 2 member 46                      |
| <b>TAS2R5</b>  | Q9NYW4 | Taste receptor type 2 member 5                       |
| <b>TAS2R50</b> | P59544 | Taste receptor type 2 member 50                      |
| <b>TAS2R60</b> | P59551 | Taste receptor type 2 member 60                      |
| <b>TAS2R7</b>  | Q9NYW3 | Taste receptor type 2 member 7                       |
| <b>TAS2R8</b>  | Q9NYW2 | Taste receptor type 2 member 8                       |
| <b>TAS2R9</b>  | Q9NYW1 | Taste receptor type 2 member 9                       |
| <b>VSIG4</b>   | Q9Y279 | V-set and immunoglobulin domain-containing protein 4 |

**Supplemental Table 7. Statistical significance of all 217 1<sup>st</sup> order networks which contains C3 (Network Collections #2 + #3).**

| Central protein | Number of edges | Number of proteins | p-value |
|-----------------|-----------------|--------------------|---------|
| 5HT1A_HUMAN     | 22683           | 274                | <1e-6   |
| 5HT1B_HUMAN     | 22523           | 271                | <1e-6   |
| 5HT1D_HUMAN     | 22678           | 271                | <1e-6   |
| 5HT1E_HUMAN     | 22678           | 271                | <1e-6   |
| 5HT1F_HUMAN     | 22678           | 271                | <1e-6   |
| 5HT5A_HUMAN     | 18182           | 197                | <1e-6   |
| A4_HUMAN        | 28148           | 493                | <1e-6   |
| AA1R_HUMAN      | 22694           | 273                | <1e-6   |
| AA3R_HUMAN      | 17537           | 188                | <1e-6   |
| ACKR3_HUMAN     | 18290           | 205                | <1e-6   |
| ACM2_HUMAN      | 18149           | 198                | <1e-6   |
| ACM4_HUMAN      | 18161           | 200                | <1e-6   |
| ADA2A_HUMAN     | 18266           | 205                | <1e-6   |
| ADA2B_HUMAN     | 17346           | 197                | <1e-6   |
| ADA2C_HUMAN     | 18191           | 199                | <1e-6   |
| AGTR2_HUMAN     | 18114           | 199                | <1e-6   |
| ANGT_HUMAN      | 27009           | 316                | <1e-6   |
| ANXA1_HUMAN     | 27187           | 343                | <1e-6   |
| APEL_HUMAN      | 17911           | 191                | <1e-6   |
| APJ_HUMAN       | 18060           | 191                | <1e-6   |
| BKRB1_HUMAN     | 26745           | 299                | <1e-6   |
| BKRB2_HUMAN     | 27009           | 310                | <1e-6   |
| C3AR_HUMAN      | 18060           | 191                | <1e-6   |
| C5AR1_HUMAN     | 18078           | 193                | <1e-6   |
| CASR_HUMAN      | 31463           | 383                | <1e-6   |
| CCL15_HUMAN     | 25442           | 290                | <1e-6   |

|                    |       |     |       |
|--------------------|-------|-----|-------|
| <b>CCL16_HUMAN</b> | 17537 | 188 | <1e-6 |
| <b>CCL19_HUMAN</b> | 18073 | 193 | <1e-6 |
| <b>CCL20_HUMAN</b> | 18075 | 196 | <1e-6 |
| <b>CCL21_HUMAN</b> | 17922 | 193 | <1e-6 |
| <b>CCL23_HUMAN</b> | 26982 | 299 | <1e-6 |
| <b>CCL25_HUMAN</b> | 18064 | 192 | <1e-6 |
| <b>CCL27_HUMAN</b> | 18060 | 191 | <1e-6 |
| <b>CCL28_HUMAN</b> | 18060 | 191 | <1e-6 |
| <b>CCL5_HUMAN</b>  | 17947 | 199 | <1e-6 |
| <b>CCR10_HUMAN</b> | 18074 | 192 | <1e-6 |
| <b>CCR1_HUMAN</b>  | 17962 | 199 | <1e-6 |
| <b>CCR2_HUMAN</b>  | 18105 | 198 | <1e-6 |
| <b>CCR3_HUMAN</b>  | 18118 | 201 | <1e-6 |
| <b>CCR4_HUMAN</b>  | 18118 | 204 | <1e-6 |
| <b>CCR5_HUMAN</b>  | 18162 | 213 | <1e-6 |
| <b>CCR6_HUMAN</b>  | 18099 | 197 | <1e-6 |
| <b>CCR7_HUMAN</b>  | 18095 | 196 | <1e-6 |
| <b>CCR8_HUMAN</b>  | 18094 | 195 | <1e-6 |
| <b>CCR9_HUMAN</b>  | 18093 | 194 | <1e-6 |
| <b>CD19_HUMAN</b>  | 161   | 32  | <1e-6 |
| <b>CD81_HUMAN</b>  | 129   | 52  | <1e-6 |
| <b>CFAB_HUMAN</b>  | 37    | 13  | <1e-6 |
| <b>CFAD_HUMAN</b>  | 4     | 4   | <1e-6 |
| <b>CFAH_HUMAN</b>  | 13    | 12  | <1e-6 |
| <b>CFAI_HUMAN</b>  | 30    | 11  | <1e-6 |
| <b>CNR1_HUMAN</b>  | 22684 | 276 | <1e-6 |
| <b>CNR2_HUMAN</b>  | 18060 | 191 | <1e-6 |
| <b>CO2_HUMAN</b>   | 9723  | 166 | <1e-6 |
| <b>CO3_HUMAN</b>   | 17993 | 217 | <1e-6 |

|                    |       |     |       |
|--------------------|-------|-----|-------|
| <b>CO4A_HUMAN</b>  | 9666  | 156 | <1e-6 |
| <b>CO4B_HUMAN</b>  | 9665  | 155 | <1e-6 |
| <b>CO5_HUMAN</b>   | 18115 | 205 | <1e-6 |
| <b>COLI_HUMAN</b>  | 22896 | 290 | <1e-6 |
| <b>CR1L_HUMAN</b>  | 24    | 8   | <1e-6 |
| <b>CR1_HUMAN</b>   | 26    | 9   | <1e-6 |
| <b>CR2_HUMAN</b>   | 17    | 11  | <1e-6 |
| <b>CXCL2_HUMAN</b> | 17937 | 195 | <1e-6 |
| <b>CXCL3_HUMAN</b> | 17927 | 193 | <1e-6 |
| <b>CXCL5_HUMAN</b> | 18062 | 192 | <1e-6 |
| <b>CXCL6_HUMAN</b> | 18068 | 195 | <1e-6 |
| <b>CXCL7_HUMAN</b> | 18062 | 192 | <1e-6 |
| <b>CXCL9_HUMAN</b> | 17929 | 193 | <1e-6 |
| <b>CXCR1_HUMAN</b> | 17355 | 187 | <1e-6 |
| <b>CXCR2_HUMAN</b> | 18081 | 198 | <1e-6 |
| <b>CXCR3_HUMAN</b> | 18080 | 193 | <1e-6 |
| <b>CXCR4_HUMAN</b> | 18267 | 224 | <1e-6 |
| <b>CXCR5_HUMAN</b> | 18211 | 199 | <1e-6 |
| <b>CXCR6_HUMAN</b> | 18074 | 192 | <1e-6 |
| <b>CXL10_HUMAN</b> | 18096 | 198 | <1e-6 |
| <b>CXL11_HUMAN</b> | 17921 | 193 | <1e-6 |
| <b>CXL13_HUMAN</b> | 18065 | 193 | <1e-6 |
| <b>CXL16_HUMAN</b> | 18060 | 191 | <1e-6 |
| <b>DAF_HUMAN</b>   | 2378  | 80  | <1e-6 |
| <b>DRD2_HUMAN</b>  | 18453 | 228 | <1e-6 |
| <b>DRD3_HUMAN</b>  | 18127 | 209 | <1e-6 |
| <b>DRD4_HUMAN</b>  | 18232 | 208 | <1e-6 |
| <b>FPR1_HUMAN</b>  | 17922 | 193 | <1e-6 |
| <b>FPR2_HUMAN</b>  | 26982 | 299 | <1e-6 |

|                    |       |     |       |
|--------------------|-------|-----|-------|
| <b>FPR3_HUMAN</b>  | 25833 | 291 | <1e-6 |
| <b>GABR1_HUMAN</b> | 23235 | 315 | <1e-6 |
| <b>GABR2_HUMAN</b> | 18370 | 225 | <1e-6 |
| <b>GALA_HUMAN</b>  | 18062 | 192 | <1e-6 |
| <b>GALR1_HUMAN</b> | 18060 | 191 | <1e-6 |
| <b>GALR2_HUMAN</b> | 18060 | 191 | <1e-6 |
| <b>GALR3_HUMAN</b> | 17714 | 190 | <1e-6 |
| <b>GBB1_HUMAN</b>  | 36904 | 891 | <1e-6 |
| <b>GBG2_HUMAN</b>  | 32162 | 433 | <1e-6 |
| <b>GNAI1_HUMAN</b> | 18437 | 241 | <1e-6 |
| <b>GNAI2_HUMAN</b> | 18551 | 261 | <1e-6 |
| <b>GNAI3_HUMAN</b> | 18430 | 239 | <1e-6 |
| <b>GNAT1_HUMAN</b> | 15680 | 223 | <1e-6 |
| <b>GNAT2_HUMAN</b> | 15672 | 219 | <1e-6 |
| <b>GNAT3_HUMAN</b> | 18523 | 242 | <1e-6 |
| <b>GPER1_HUMAN</b> | 18088 | 194 | <1e-6 |
| <b>GPR17_HUMAN</b> | 26982 | 299 | <1e-6 |
| <b>GPR18_HUMAN</b> | 18060 | 191 | <1e-6 |
| <b>GPR55_HUMAN</b> | 18060 | 191 | <1e-6 |
| <b>GRM2_HUMAN</b>  | 18148 | 200 | <1e-6 |
| <b>GRM3_HUMAN</b>  | 18142 | 198 | <1e-6 |
| <b>GRM4_HUMAN</b>  | 18095 | 198 | <1e-6 |
| <b>GRM6_HUMAN</b>  | 18080 | 195 | <1e-6 |
| <b>GRM7_HUMAN</b>  | 18173 | 210 | <1e-6 |
| <b>GRM8_HUMAN</b>  | 18129 | 207 | <1e-6 |
| <b>GROA_HUMAN</b>  | 17934 | 196 | <1e-6 |
| <b>HCAR1_HUMAN</b> | 18060 | 191 | <1e-6 |
| <b>HCAR2_HUMAN</b> | 18110 | 201 | <1e-6 |
| <b>HCAR3_HUMAN</b> | 18110 | 201 | <1e-6 |

|                    |       |     |       |
|--------------------|-------|-----|-------|
| <b>HEBP1_HUMAN</b> | 18086 | 194 | <1e-6 |
| <b>HRH3_HUMAN</b>  | 18100 | 194 | <1e-6 |
| <b>HRH4_HUMAN</b>  | 18060 | 191 | <1e-6 |
| <b>HUNIN_HUMAN</b> | 25682 | 293 | <1e-6 |
| <b>IFM1_HUMAN</b>  | 19    | 10  | <1e-6 |
| <b>IFM2_HUMAN</b>  | 15    | 9   | <1e-6 |
| <b>IFM3_HUMAN</b>  | 28    | 14  | <1e-6 |
| <b>IL8_HUMAN</b>   | 17769 | 203 | <1e-6 |
| <b>INSL5_HUMAN</b> | 17909 | 190 | <1e-6 |
| <b>KNG1_HUMAN</b>  | 27049 | 321 | <1e-6 |
| <b>LPAR1_HUMAN</b> | 27015 | 305 | <1e-6 |
| <b>LPAR2_HUMAN</b> | 26994 | 304 | <1e-6 |
| <b>LPAR3_HUMAN</b> | 26982 | 299 | <1e-6 |
| <b>LPAR5_HUMAN</b> | 26982 | 299 | <1e-6 |
| <b>MCHR1_HUMAN</b> | 26983 | 300 | <1e-6 |
| <b>MCHR2_HUMAN</b> | 26512 | 296 | <1e-6 |
| <b>MCH_HUMAN</b>   | 26982 | 299 | <1e-6 |
| <b>MCP_HUMAN</b>   | 55    | 20  | <1e-6 |
| <b>MTR1A_HUMAN</b> | 17994 | 210 | <1e-6 |
| <b>MTR1B_HUMAN</b> | 22672 | 285 | <1e-6 |
| <b>NMS_HUMAN</b>   | 26982 | 299 | <1e-6 |
| <b>NMUR1_HUMAN</b> | 26336 | 295 | <1e-6 |
| <b>NMUR2_HUMAN</b> | 26982 | 299 | <1e-6 |
| <b>NMU_HUMAN</b>   | 26740 | 298 | <1e-6 |
| <b>NPBW1_HUMAN</b> | 18060 | 191 | <1e-6 |
| <b>NPBW2_HUMAN</b> | 17355 | 187 | <1e-6 |
| <b>NPB_HUMAN</b>   | 18060 | 191 | <1e-6 |
| <b>NPW_HUMAN</b>   | 17909 | 190 | <1e-6 |
| <b>NPY1R_HUMAN</b> | 18085 | 192 | <1e-6 |

|                    |       |     |       |
|--------------------|-------|-----|-------|
| <b>NPY2R_HUMAN</b> | 18085 | 192 | <1e-6 |
| <b>NPY4R_HUMAN</b> | 18085 | 192 | <1e-6 |
| <b>NPY5R_HUMAN</b> | 17934 | 191 | <1e-6 |
| <b>NPY_HUMAN</b>   | 18103 | 195 | <1e-6 |
| <b>OPRD_HUMAN</b>  | 18280 | 209 | <1e-6 |
| <b>OPRK_HUMAN</b>  | 22667 | 275 | <1e-6 |
| <b>OPRM_HUMAN</b>  | 22882 | 298 | <1e-6 |
| <b>OPRX_HUMAN</b>  | 22628 | 270 | <1e-6 |
| <b>OXER1_HUMAN</b> | 17537 | 188 | <1e-6 |
| <b>OXGR1_HUMAN</b> | 18060 | 191 | <1e-6 |
| <b>P2RY4_HUMAN</b> | 18195 | 197 | <1e-6 |
| <b>P2Y12_HUMAN</b> | 18263 | 202 | <1e-6 |
| <b>P2Y13_HUMAN</b> | 18263 | 202 | <1e-6 |
| <b>P2Y14_HUMAN</b> | 18263 | 202 | <1e-6 |
| <b>PAHO_HUMAN</b>  | 18060 | 191 | <1e-6 |
| <b>PD2R2_HUMAN</b> | 18066 | 194 | <1e-6 |
| <b>PDYN_HUMAN</b>  | 18093 | 193 | <1e-6 |
| <b>PE2R3_HUMAN</b> | 18176 | 198 | <1e-6 |
| <b>PENK_HUMAN</b>  | 17910 | 191 | <1e-6 |
| <b>PF4V_HUMAN</b>  | 15926 | 180 | <1e-6 |
| <b>PLF4_HUMAN</b>  | 17961 | 203 | <1e-6 |
| <b>PNOC_HUMAN</b>  | 18060 | 191 | <1e-6 |
| <b>PROP_HUMAN</b>  | 6     | 6   | <1e-6 |
| <b>PYY_HUMAN</b>   | 17921 | 193 | <1e-6 |
| <b>REL3_HUMAN</b>  | 22692 | 281 | <1e-6 |
| <b>RL3R1_HUMAN</b> | 18060 | 191 | <1e-6 |
| <b>RL3R2_HUMAN</b> | 17909 | 190 | <1e-6 |
| <b>S1PR1_HUMAN</b> | 22679 | 278 | <1e-6 |
| <b>S1PR2_HUMAN</b> | 22676 | 275 | <1e-6 |

|                    |       |     |       |
|--------------------|-------|-----|-------|
| <b>S1PR3_HUMAN</b> | 18063 | 192 | <1e-6 |
| <b>S1PR4_HUMAN</b> | 18065 | 193 | <1e-6 |
| <b>S1PR5_HUMAN</b> | 22624 | 272 | <1e-6 |
| <b>SAA1_HUMAN</b>  | 26114 | 300 | <1e-6 |
| <b>SDF1_HUMAN</b>  | 18078 | 195 | <1e-6 |
| <b>SMS_HUMAN</b>   | 18061 | 192 | <1e-6 |
| <b>SSR1_HUMAN</b>  | 18074 | 195 | <1e-6 |
| <b>SSR2_HUMAN</b>  | 18085 | 199 | <1e-6 |
| <b>SSR3_HUMAN</b>  | 18154 | 213 | <1e-6 |
| <b>SSR4_HUMAN</b>  | 17922 | 193 | <1e-6 |
| <b>SSR5_HUMAN</b>  | 22633 | 273 | <1e-6 |
| <b>SUCR1_HUMAN</b> | 18192 | 196 | <1e-6 |
| <b>T2R10_HUMAN</b> | 18060 | 191 | <1e-6 |
| <b>T2R13_HUMAN</b> | 17937 | 193 | <1e-6 |
| <b>T2R14_HUMAN</b> | 17909 | 190 | <1e-6 |
| <b>T2R16_HUMAN</b> | 17909 | 190 | <1e-6 |
| <b>T2R19_HUMAN</b> | 18060 | 191 | <1e-6 |
| <b>T2R20_HUMAN</b> | 18060 | 191 | <1e-6 |
| <b>T2R30_HUMAN</b> | 18060 | 191 | <1e-6 |
| <b>T2R31_HUMAN</b> | 18060 | 191 | <1e-6 |
| <b>T2R38_HUMAN</b> | 18060 | 191 | <1e-6 |
| <b>T2R39_HUMAN</b> | 18060 | 191 | <1e-6 |
| <b>T2R40_HUMAN</b> | 18060 | 191 | <1e-6 |
| <b>T2R41_HUMAN</b> | 18060 | 191 | <1e-6 |
| <b>T2R42_HUMAN</b> | 18060 | 191 | <1e-6 |
| <b>T2R43_HUMAN</b> | 18060 | 191 | <1e-6 |
| <b>T2R45_HUMAN</b> | 17205 | 186 | <1e-6 |
| <b>T2R46_HUMAN</b> | 18060 | 191 | <1e-6 |
| <b>T2R50_HUMAN</b> | 18060 | 191 | <1e-6 |



|                    |       |     |         |
|--------------------|-------|-----|---------|
| <b>T2R60_HUMAN</b> | 17909 | 190 | <1e-6   |
| <b>TA2R1_HUMAN</b> | 17713 | 189 | <1e-6   |
| <b>TA2R3_HUMAN</b> | 18060 | 191 | <1e-6   |
| <b>TA2R4_HUMAN</b> | 17909 | 190 | <1e-6   |
| <b>TA2R5_HUMAN</b> | 17537 | 188 | <1e-6   |
| <b>TA2R7_HUMAN</b> | 18060 | 191 | <1e-6   |
| <b>TA2R8_HUMAN</b> | 18060 | 191 | <1e-6   |
| <b>TA2R9_HUMAN</b> | 18060 | 191 | <1e-6   |
| <b>TF65_HUMAN</b>  | 4022  | 343 | <1e-6   |
| <b>VSIG4_HUMAN</b> | 1     | 2   | 0.00001 |
| <b>ITAX_HUMAN</b>  | 357   | 33  | 0.00046 |
| <b>CBPN_HUMAN</b>  | 1     | 2   | 0.00463 |
| <b>FHR3_HUMAN</b>  | 1     | 2   | 0.00469 |
| <b>FHR5_HUMAN</b>  | 1     | 2   | 0.00478 |
| <b>FHR4_HUMAN</b>  | 1     | 2   | 0.00482 |
| <b>ITB2_HUMAN</b>  | 1132  | 106 | 0.02148 |
| <b>HNF4A_HUMAN</b> | 498   | 82  | 0.02458 |

**Supplemental Table 8. Ingenuity Pathway Analysis of C3 Interacting Partners.** The *Ratio* indicates the number of expressed genes that maps to the pathway divided by the total number of genes that map to the canonical pathway.

| Ingenuity Canonical Pathways                | $-\log(p\text{-value})$ | Ratio | Molecules                                                                                                                                                                                                                                                                                                                                   |
|---------------------------------------------|-------------------------|-------|---------------------------------------------------------------------------------------------------------------------------------------------------------------------------------------------------------------------------------------------------------------------------------------------------------------------------------------------|
| <b>Gai Signaling</b>                        | 74,2                    | 0,442 | ADRA2B,GRM3,RXFP4,GNB1,CHRM2,HTR1B,HTR1E,CNR2,GRM6,APLNR,OPRM1,GRM8,CNR1,SSTR3,GN G2,GRM4,DRD2,FPR1,S1PR3,GRM7,ADRA2A,AGTR2,GPR17,GRM2,PTGER3,CHRM4,ADORA3,HTR1D,HR H3,OPRL1,CXCR2,DRD4,ADORA1,DRD3,HCAR2,NP Y1R,GNAI1,FPR2,GABBR1,GNAI2,GNAI3,OPRD1,P2 RY13,GABBR2,P2RY14,LPAR1,CCR4,OPRK1,S1PR1,P 2RY12,ADRA2C,HTR1F,HTR1A                |
| <b>cAMP-mediated signaling</b>              | 59,1                    | 0,244 | ADRA2B,HCAR3,GRM3,RXFP4,CHRM2,HTR1B,HTR 1E,CNR2,GRM6,APLNR,OPRM1,GRM8,CNR1,SSTR3, GRM4,DRD2,FPR1,S1PR3,GRM7,ADRA2A,AGTR2,GP R17,GRM2,HTR5A,PTGER3,CHRM4,ADORA3,HTR1D ,HRH3,OPRL1,CXCR2,DRD4,DRD3,ADORA1,HCAR2, NPY1R,FPR2,GNAI1,GABBR1,GNAI2,GNAI3,OPRD1, P2RY13,GABBR2,GPER1,P2RY14,LPAR1,CCR4,OPRK 1,S1PR1,P2RY12,ADRA2C,HTR1F,HTR1A      |
| <b>G-Protein Coupled Receptor Signaling</b> | 55,5                    | 0,204 | ADRA2B,HCAR3,GRM3,RXFP4,CHRM2,HTR1B,HTR 1E,CNR2,GRM6,APLNR,OPRM1,GRM8,CNR1,SSTR3, GRM4,DRD2,FPR1,S1PR3,GRM7,ADRA2A,AGTR2,RE LA,GPR17,GRM2,HTR5A,PTGER3,CHRM4,ADORA3, HTR1D,HRH3,OPRL1,CXCR2,DRD4,DRD3,ADORA1, HCAR2,NPY1R,FPR2,GNAI1,GABBR1,GNAI2,GNAI3, OPRD1,P2RY13,GABBR2,GPER1,P2RY14,CCR4,LPAR 1,OPRK1,S1PR1,P2RY12,ADRA2C,HTR1F,HTR1A |
| <b>Granulocyte Adhesion and Diapedesis</b>  | 37,4                    | 0,209 | FPR3,CXCL12,CCL20,CCL5,CXCL5,CXCL9,HRH3,CX CL10,CXCL3,CXCL13,CXCR2,CCL28,CCL25,CXCL1, CCL16,CCL15,CCL19,CXCL8,CXCL11,C5AR1,CCL23, CXCR4,PF4,PPBP,GNAI1,FPR2,CXCL6,C5,FPR1,GNAI 2,ITGB2,GNAI3,CXCL16,CCL27,CCL21,CXCL2,HRH4                                                                                                                  |
| <b>Gustation Pathway</b>                    | 35,7                    | 0,262 | GNAT3,TAS2R9,TAS2R41,TAS2R31,TAS2R16,TAS2R 30,TAS2R10,TAS2R39,TAS2R8,TAS2R3,GNB1,TAS2R 38,TAS2R5,TAS2R43,TAS2R1,TAS2R46,P2RY4,TAS2 R50,TAS2R19,TAS2R60,GNG2,TAS2R42,TAS2R7,TAS 2R4,TAS2R13,P2RY13,P2RY14,TAS2R45,TAS2R40,P2 RY12,TAS2R20,TAS2R14                                                                                            |
| <b>Agranulocyte Adhesion and Diapedesis</b> | 30,5                    | 0,175 | CXCL12,CCL20,CCL5,CXCL5,CXCR1,CXCL9,CXCL1 0,CXCL3,CXCL13,CXCR2,CCL28,CCL25,CXCL1,CCL 16,CCL15,CCL19,CXCL8,CXCL11,C5AR1,CXCR4,CC L23,PF4,PPBP,GNAI1,CXCL6,C5,GNAI2,ITGB2,GNAI 3,CXCL16,CCL27,CCL21,CXCL2                                                                                                                                     |

|                                                                                        |      |       |                                                                            |
|----------------------------------------------------------------------------------------|------|-------|----------------------------------------------------------------------------|
| <b>Complement System</b>                                                               | 22,1 | 0,432 | CFD,C5AR1,C3,CD46,C5,C4A/C4B,ITGB2,CR1,CD55,CFB,CFI,CFH,C3AR1,C2,ITGAX,CR2 |
| <b>Pathogenesis of Multiple Sclerosis</b>                                              | 12,4 | 0,778 | CXCL10,CCR1,CXCL11,CCR5,CXCR3,CCL5,CXCL9                                   |
| <b>Role of IL-17A in Psoriasis</b>                                                     | 8,77 | 0,462 | CXCL8,CXCL3,CCL20,CXCL1,CXCL5,CXCL6                                        |
| <b>GPCR-Mediated Integration of Enteroendocrine Signaling Exemplified by an L Cell</b> | 8,52 | 0,139 | GNAI2,GNAI3,CHRM2,GAL,SSTR5,GNAI1,NPY2R,SS T,GALR1,PYY                     |
| <b>IL-17A Signaling in Gastric Cells</b>                                               | 8,37 | 0,280 | CXCL10,CXCL8,RELA,CXCL11,CCL20,CXCL1,CCL5                                  |
| <b>Ephrin B Signaling</b>                                                              | 7,26 | 0,123 | GNAI2,GNB1,GNAI3,GNAT1,CXCR4,GNG2,CXCL12, GNAI1,GNAT2                      |
| <b>CREB Signaling in Neurons</b>                                                       | 7,26 | 0,071 | GNAI2,GRM7,GNB1,GNAI3,GRM2,GNAT1,GRM8,GR M3,GNG2,GNAI1,GRM6,GNAT2,GRM4     |
| <b>Glutamate Receptor Signaling</b>                                                    | 6,96 | 0,140 | GRM7,GNB1,GRM2,GRM8,GRM3,GNG2,GRM6,GRM 4                                   |
| <b>IL-8 Signaling</b>                                                                  | 6,91 | 0,066 | RELA,CXCL8,GNG2,GNAI1,CXCR1,GNB1,GNAI2,GN AI3,ITGB2,CXCR2,CXCL1,CR2,ITGAX  |
| <b>Synaptic Long Term Depression</b>                                                   | 6,51 | 0,075 | GNAI2,GRM7,GNAI3,GRM2,GNAT1,GRM8,GRM3,GN AI1,GRM6,GNAT2,GRM4               |
| <b>Role of IL-17A in Arthritis</b>                                                     | 6,4  | 0,119 | CXCL8,RELA,CXCL3,CCL20,CXCL1,CXCL5,CCL5,C XCL6                             |
| <b>Chemokine Signaling</b>                                                             | 6,21 | 0,113 | GNAI2,CCR3,GNAI3,CCR5,CXCR4,CXCL12,GNAI1,C CL5                             |
| <b>Neuroprotective Role of THOP1 in Alzheimer's Disease</b>                            | 5,52 | 0,150 | KNG1,PDYN,SST,PNOC,AGT,APP                                                 |
| <b>IL-1 Signaling</b>                                                                  | 5,38 | 0,088 | GNAI2,GNB1,GNAI3,RELA,GNAT1,GNG2,GNAI1,GN AT2                              |
| <b>fMLP Signaling in Neutrophils</b>                                                   | 5,38 | 0,074 | GNAI2,GNB1,FPR3,GNAI3,RELA,GNG2,GNAI1,FPR2, FPR1                           |
| <b>Role of IL-17F in Allergic Inflammatory Airway Diseases</b>                         | 5,27 | 0,136 | CXCL10,CXCL8,RELA,CXCL1,CXCL5,CXCL6                                        |
| <b>CCR5 Signaling in Macrophages</b>                                                   | 5,19 | 0,101 | GNAI2,GNB1,GNAI3,CCR5,GNG2,GNAI1,CCL5                                      |

|                                                                                                  |      |       |                                                                  |
|--------------------------------------------------------------------------------------------------|------|-------|------------------------------------------------------------------|
| <b>Gas Signaling</b>                                                                             | 4,8  | 0,073 | GNB1,HCAR3,GPER1,HTR5A,CNR1,OPRK1,GNG2,H<br>CAR2                 |
| <b>Androgen Signaling</b>                                                                        | 4,74 | 0,072 | GNAI2,GNB1,GNAI3,RELA,GNAT1,GNG2,GNAI1,GN<br>AT2                 |
| <b>Hepatic Fibrosis /<br/>Hepatic Stellate Cell<br/>Activation</b>                               | 4,72 | 0,055 | CXCL8,RELA,CXCL3,CCR5,CCL21,CXCR3,CCL5,CX<br>CL9,CCR7,AGT        |
| <b>Relaxin Signaling</b>                                                                         | 4,62 | 0,060 | GNAI2,GNB1,GNAI3,RELA,GNAT1,GNG2,GNAI1,GN<br>AT2,RLN3            |
| <b>GPCR-Mediated<br/>Nutrient Sensing in<br/>Enteroendocrine Cells</b>                           | 4,59 | 0,082 | GNAI2,GNAI3,CASR,GNG2,LPAR5,GNAI1,PYY                            |
| <b>G Beta Gamma<br/>Signaling</b>                                                                | 4,49 | 0,080 | GNAI2,GNB1,GNAI3,GNAT1,GNG2,GNAI1,GNAT2                          |
| <b>Sphingosine-1-<br/>phosphate Signaling</b>                                                    | 4,44 | 0,066 | S1PR4,GNAI2,S1PR3,GNAI3,S1PR2,S1PR5,GNAI1,S1P<br>R1              |
| <b>CXCR4 Signaling</b>                                                                           | 4,3  | 0,055 | GNAI2,GNB1,GNAI3,GNAT1,CXCR4,GNG2,CXCL12,<br>GNAI1,GNAT2         |
| <b>P2Y Purigenic Receptor<br/>Signaling Pathway</b>                                              | 4,2  | 0,061 | GNAI2,GNB1,GNAI3,RELA,P2RY4,GNG2,GNAI1,P2R<br>Y12                |
| <b>Role of<br/>Hypercytokinemia/hype<br/>rchemokine in the<br/>Pathogenesis of<br/>Influenza</b> | 4,13 | 0,116 | CXCL10,CCR1,CXCL8,CCR5,CCL5                                      |
| <b>Serotonin Receptor<br/>Signaling</b>                                                          | 4,13 | 0,116 | HTR1B,HTR5A,HTR1E,HTR1A,HTR1D                                    |
| <b>Ephrin Receptor<br/>Signaling</b>                                                             | 4,12 | 0,052 | GNAI2,GNB1,GNAI3,GNAT1,CXCR4,GNG2,CXCL12,<br>GNAI1,GNAT2         |
| <b>Role of PI3K/AKT<br/>Signaling in the<br/>Pathogenesis of<br/>Influenza</b>                   | 3,9  | 0,079 | GNAI2,GNAI3,RELA,CCR5,GNAI1,CCL5                                 |
| <b>IL-17A Signaling in<br/>Airway Cells</b>                                                      | 3,87 | 0,078 | RELA,CXCL3,CCL20,CXCL1,CXCL5,CXCL6                               |
| <b>Cardiac Hypertrophy<br/>Signaling</b>                                                         | 3,81 | 0,043 | ADRA2B,GNAI2,GNB1,GNAI3,GNAT1,ADRA2A,GNG<br>2,GNAI1,GNAT2,ADRA2C |
| <b>IL-17 Signaling</b>                                                                           | 3,63 | 0,071 | CXCL10,CXCL8,RELA,CXCL11,CXCL1,CXCL5                             |
| <b><math>\alpha</math>-Adrenergic Signaling</b>                                                  | 3,58 | 0,069 | GNAI2,GNB1,GNAI3,ADRA2A,GNG2,GNAI1                               |

## Supplemental References

1. Eizirik DL, Sammeth M, Bouckenooghe T, Bottu G, Sisino G, Igoillo-Esteve M, Ortis F, Santin I, Colli ML, Barthson J, Bouwens L, Hughes L, Gregory L, Lunter G, Marselli L, Marchetti P, McCarthy MI, Cnop M. The human pancreatic islet transcriptome: expression of candidate genes for type 1 diabetes and the impact of pro-inflammatory cytokines. *PLoS Genet* 2012 8:e1002552
2. Marhfour I, Lopez XM, Lefkaditis D, Salmon I, Allagnat F, Richardson SJ, Morgan NG, Eizirik DL. Expression of endoplasmic reticulum stress markers in the islets of patients with type 1 diabetes. *Diabetologia* 2012 55:2417-20
